# Supplementary material for: Development of a Nomogram for Predicting the Risk of Carcinoma in Chronic Atrophic Gastritis
Source: Research Square preprint supplement (doi:10.21203/rs.3.rs-5554170/v1), 2025-04-14
Supplement: Supplementary file 1 [file b2901ac9d89e59e95e3e0ba3.xlsx]

## Sheet: Sheet1
id	id	status	sex	year	Prothrombin_time(sec)	fibrinogen(g/L)	D_dimer(ng/mL)	TT_ratio	White_blood_cell_count(·109/L)	Red_blood_cell_count(·109/L)	Mean_corpuscular_volume(fL)	Lymphocyte_count(·109/L)	haemoglobin(g/L)	platelet(·109/L)	Neutrophil_count(·109/L)	cholesterol(mmol/L)	Low_density_lipoprotein(mmol/L)	high_density_lipoprotein(mmol/L)	Triglycerides(mmol/L)	Aspartate_aminotransferase(U/L)	Alanine_aminotransferase(U/L)	potassium(mmol/L)	uric_acid(μmol/L)	glucose(mmol/L)
597434	1	0	1	1	1	0	0	0	0	0	0	0	0	0	0	0	0	0	0	0	0	0	0	0
1328994	2	0	0	0	1	0	0	0	0	0	0	0	0	0	0	0	0	0	0	0	0	0	0	0
696029	3	0	1	1	1	0	0	0	0	0	0	0	0	0	0	0	0	0	0	0	0	0	0	0
1897680	4	0	1	0	1	0	0	0	0	1	0	0	0	0	0	0	0	0	0	0	0	0	0	0
1591773	5	0	0	1	1	0	0	0	0	0	0	0	0	0	0	0	0	0	0	0	0	0	0	0
1287967	6	0	0	1	1	0	0	0	0	0	0	0	0	0	0	0	0	0	0	0	0	0	0	0
1457484	7	0	0	1	1	0	0	0	0	0	0	0	0	0	0	0	0	0	0	0	0	0	0	0
1410360	8	0	0	1	1	0	0	0	0	0	0	0	0	0	0	0	0	0	0	0	0	0	0	0
1607621	9	0	1	0	1	0	0	0	0	0	0	0	0	0	0	0	0	0	0	0	0	0	0	0
1426403	10	0	1	1	1	0	0	0	0	0	0	0	0	0	0	0	0	0	0	0	0	0	0	0
1179655	11	0	0	1	1	0	0	0	0	0	0	0	0	0	0	0	0	0	0	0	0	0	0	0
1416803	12	0	0	0	0	0	0	0	0	0	0	0	0	0	0	0	0	0	0	0	0	0	0	0
1179953	13	0	0	0	0	0	0	0	0	1	0	0	0	0	0	0	0	0	0	0	0	0	0	0
1383518	14	0	0	1	0	0	1	0	0	0	0	0	0	0	0	0	0	0	0	0	0	0	0	0
1682231	15	0	0	1	0	0	0	0	0	0	0	0	0	0	0	0	0	0	0	0	0	0	0	0
699187	16	0	0	1	0	0	0	0	0	0	0	0	0	0	0	0	0	0	0	0	0	0	0	0
1215087	17	0	0	1	0	2	0	0	0	0	0	1	0	0	0	0	0	0	0	0	0	0	0	0
1596086	18	0	1	0	0	0	0	0	0	1	0	0	1	0	0	0	0	0	0	0	0	0	0	0
1551059	19	0	1	0	0	0	0	0	0	1	0	0	1	0	0	0	0	0	0	0	0	0	0	0
1062676	20	0	1	1	1	0	0	0	0	0	0	1	1	0	0	0	0	0	0	0	0	0	0	0
1881152	21	0	1	0	1	0	0	0	0	1	0	2	1	0	0	0	0	0	0	0	0	0	0	0
796074	22	0	0	1	1	0	0	0	0	1	0	0	0	1	0	0	0	0	0	0	0	0	0	0
1556670	23	0	0	1	0	0	0	0	2	2	1	0	1	2	0	0	0	0	0	0	0	0	0	0
794125	24	0	0	1	1	0	0	0	0	0	0	0	0	0	1	0	0	0	0	0	0	0	0	0
1701477	25	0	0	0	1	0	0	0	0	0	0	0	0	0	1	0	0	0	0	0	0	0	0	0
1454007	26	0	1	1	1	0	0	0	0	1	0	0	1	0	1	0	0	0	0	0	0	0	0	0
936716	27	0	1	1	0	0	1	0	0	0	0	0	1	0	1	0	0	0	0	0	0	0	0	0
1721688	28	0	1	1	0	0	0	0	0	0	0	0	0	0	1	2	0	0	0	0	0	0	0	0
1146877	29	0	0	0	0	0	0	0	0	0	0	0	0	0	0	0	1	0	0	0	0	0	0	0
1595836	30	0	1	1	0	0	0	0	0	0	0	0	1	0	0	0	1	0	0	0	0	0	0	0
1610139	31	0	1	0	0	0	0	0	0	0	0	0	0	0	1	0	1	0	0	0	0	0	0	0
1538813	32	0	1	1	1	0	0	0	0	0	0	0	0	0	0	2	1	0	0	0	0	0	0	0
1324215	33	0	1	1	1	0	0	0	0	0	0	0	0	0	0	2	1	0	0	0	0	0	0	0
1617917	34	0	0	0	0	0	0	0	2	0	0	2	0	0	0	2	1	0	0	0	0	0	0	0
1182374	35	0	1	1	1	0	0	0	0	1	0	0	1	0	0	2	1	0	0	0	0	0	0	0
1264429	36	0	1	0	1	0	0	0	0	1	0	0	1	0	0	2	1	0	0	0	0	0	0	0
1433367	37	0	1	0	0	0	0	0	0	1	0	0	1	0	0	2	1	0	0	0	0	0	0	0
1065294	38	0	1	1	1	0	0	0	0	0	0	0	0	0	1	2	1	0	0	0	0	0	0	0
599241	39	0	1	0	1	0	0	0	0	1	0	0	1	0	1	2	1	0	0	0	0	0	0	0
1646261	40	0	0	1	0	0	0	0	0	0	0	0	0	0	0	0	0	1	0	0	0	0	0	0
1501814	41	0	1	1	1	0	0	0	0	0	0	0	0	0	0	0	0	2	0	0	0	0	0	0
1412248	42	0	1	1	0	0	0	0	0	1	0	0	1	0	0	0	0	2	0	0	0	0	0	0
1333197	43	0	1	0	1	0	0	0	0	0	0	0	0	0	1	0	0	2	0	0	0	0	0	0
1481984	44	0	1	1	1	0	0	0	0	1	0	0	1	0	0	2	0	2	0	0	0	0	0	0
1707439	45	0	1	1	1	0	0	0	1	1	0	1	1	0	0	2	0	2	0	0	0	0	0	0
1182442	46	0	1	1	0	0	0	0	0	0	0	0	0	0	1	2	0	2	0	0	0	0	0	0
1705888	47	0	1	1	1	0	0	0	0	0	0	0	0	0	0	2	1	2	0	0	0	0	0	0
1361898	48	0	1	1	0	0	0	0	0	0	0	0	0	0	0	2	1	2	0	0	0	0	0	0
1684197	49	0	1	1	1	0	0	0	0	1	0	0	1	0	0	2	1	2	0	0	0	0	0	0
1467621	50	0	1	1	1	0	0	0	1	1	0	0	1	0	1	2	1	2	0	0	0	0	0	0
1533080	51	0	1	1	1	0	0	0	0	0	0	0	0	0	0	0	0	0	2	0	0	0	0	0
790308	52	0	0	1	0	0	0	0	0	0	0	0	0	0	0	0	0	0	2	0	0	0	0	0
1144678	53	0	0	1	0	0	0	0	0	0	0	0	0	0	0	0	0	0	2	0	0	0	0	0
1553204	54	0	1	1	0	0	0	0	0	0	0	0	0	0	0	0	1	0	2	0	0	0	0	0
1292316	55	0	0	1	1	0	0	0	0	0	0	0	0	0	0	0	0	1	2	0	0	0	0	0
539397	56	0	0	1	0	0	0	0	0	0	0	0	0	0	0	0	0	0	0	1	0	0	0	0
1659682	57	0	0	0	1	1	0	0	0	0	0	0	1	0	0	0	0	0	0	1	0	0	0	0
1553766	58	0	1	0	1	0	0	0	0	1	0	0	1	0	0	0	0	0	0	1	0	0	0	0
1590934	59	0	1	0	0	0	0	0	0	0	0	0	1	0	0	0	0	0	0	1	0	0	0	0
1278196	60	0	0	1	0	0	0	0	2	0	0	0	0	0	2	0	0	0	0	1	0	0	0	0
1416034	61	0	1	1	0	0	0	0	0	0	0	0	0	0	0	2	0	0	0	1	0	0	0	0
549029	62	0	1	1	0	0	0	0	0	1	0	0	1	0	0	2	0	0	0	1	0	0	0	0
432163	63	0	1	1	0	0	0	0	0	1	0	0	0	0	0	0	0	0	0	0	1	0	0	0
656928	64	0	1	0	1	0	0	0	0	0	0	0	0	0	0	0	0	0	0	1	1	0	0	0
1514137	65	0	1	1	1	0	0	0	0	1	0	0	1	0	0	0	0	0	0	1	1	0	0	0
1463909	66	0	1	1	0	0	0	0	0	1	0	0	1	0	0	0	0	0	0	1	1	0	0	0
1596804	67	0	0	1	0	0	0	0	0	0	0	0	0	0	0	0	0	0	0	2	2	0	0	0
1326423	68	0	1	1	0	0	0	0	0	0	0	0	0	0	0	2	1	0	0	0	0	1	0	0
1380661	69	0	0	1	1	2	1	0	2	1	0	0	1	0	2	0	0	1	0	1	0	1	0	0
502960	70	0	1	0	1	0	0	0	0	0	0	0	1	0	0	0	0	0	0	0	0	0	2	0
497333	71	0	0	1	0	0	0	0	0	0	0	0	0	0	0	0	1	0	0	0	0	0	2	0
1381152	72	0	0	0	1	0	0	2	0	0	0	0	0	0	0	0	0	1	2	0	0	0	2	0
1553724	73	0	0	1	0	1	0	0	0	0	0	0	0	0	0	0	0	1	2	0	0	0	2	0
1533899	74	0	0	0	1	0	0	0	0	0	0	0	0	0	0	0	0	0	0	1	0	0	2	0
1371316	75	0	0	1	0	0	0	0	0	0	0	0	1	0	0	0	0	0	2	1	0	0	2	0
1323527	76	0	1	1	1	0	0	0	0	1	0	0	1	0	0	0	0	0	2	0	0	1	2	0
1434553	77	0	1	0	1	0	0	0	0	0	0	0	0	0	0	0	1	0	0	0	0	0	0	1
1560559	78	0	1	0	0	0	0	0	0	1	0	0	1	0	0	0	0	2	0	0	0	0	0	1
1585406	79	0	1	1	0	0	0	0	0	0	0	0	0	0	0	0	0	0	0	0	0	0	0	2
1699703	80	0	0	1	0	0	0	0	0	0	0	0	0	0	0	0	0	0	0	0	0	0	0	2
677185	81	0	0	1	0	0	0	0	0	0	0	0	0	0	0	0	0	0	0	0	0	0	0	2
1431453	82	0	0	1	0	0	0	0	0	0	0	0	0	0	0	0	0	0	0	0	0	0	0	2
1370482	83	0	1	1	1	0	0	0	0	0	1	2	1	0	0	0	0	0	0	0	0	0	0	2
691553	84	0	1	1	0	0	0	0	0	0	0	0	0	0	0	2	1	0	2	0	2	0	2	2
1683318	85	0	0	1	0	0	0	0	0	1	2	0	1	1	0	0	0	0	0	2	0	0	0	2
1048870	86	0	0	1	1	0	1	0	0	0	0	0	0	0	0	0	1	0	0	0	0	0	2	2
763213	87	0	1	0	0	0	0	0	0	0	0	0	0	0	1	2	1	0	0	0	0	0	0	0
818055	88	0	1	1	0	0	0	0	0	0	0	0	0	0	0	2	1	0	0	0	0	0	0	0
1560559	89	0	1	0	0	0	0	0	0	1	0	0	1	0	0	0	0	2	0	0	0	0	0	1
1438337	90	0	0	1	0	0	0	0	0	0	0	1	0	0	0	0	1	0	0	0	0	0	0	2
1473442	91	0	0	0	0	0	0	0	0	0	0	0	0	0	0	0	1	0	2	0	0	0	0	2
589971	92	0	1	1	0	0	1	0	0	0	0	0	0	0	0	2	1	0	2	0	0	0	0	0
1398029	93	0	1	1	0	0	0	0	0	0	0	0	0	0	0	2	1	2	0	0	0	0	0	0
1538514	94	0	1	0	0	0	0	0	0	0	0	0	0	0	0	0	1	0	0	0	0	0	0	0
1039048	95	0	0	0	0	0	0	0	0	0	0	0	0	0	0	0	1	0	2	0	0	0	0	0
1536948	96	0	1	1	0	0	1	0	0	0	0	0	0	0	0	2	1	0	0	0	0	0	0	0
1366675	97	0	0	1	0	0	0	0	0	0	0	0	0	0	0	0	1	0	2	0	0	0	0	0
1086242	98	0	0	0	0	0	0	0	0	0	0	0	0	0	0	2	1	0	2	0	0	0	0	0
716938	99	0	1	1	0	0	0	0	0	0	0	0	0	0	0	0	0	0	0	0	0	0	0	2
1456994	100	0	0	0	0	0	1	0	0	0	0	0	0	0	0	0	1	1	2	0	0	0	0	2
1595115	101	0	0	0	0	0	0	0	0	0	0	0	0	0	0	0	0	0	0	0	0	0	2	0
1546399	102	0	0	0	0	0	0	0	0	0	0	0	0	0	0	0	0	0	0	1	0	0	0	0
1160838	103	0	1	0	0	0	0	0	0	0	0	0	0	0	0	0	0	0	0	0	0	0	0	0
1260042	104	0	1	1	0	1	0	0	1	0	0	0	0	0	1	0	0	0	0	1	0	0	0	0
687305	105	0	1	1	0	0	0	0	0	0	0	0	1	0	0	0	1	0	0	0	0	0	0	0
1266030	106	0	1	0	0	0	0	0	0	0	0	0	0	0	0	0	1	0	0	0	0	0	0	0
1800555	107	0	1	1	0	0	0	0	0	0	0	1	0	0	0	0	1	0	0	0	0	0	0	0
552697	108	0	0	1	0	0	0	0	0	0	0	0	0	0	0	2	1	0	0	0	0	0	0	0
688965	109	0	1	1	0	0	1	0	0	0	0	0	0	0	0	0	0	0	0	0	0	0	0	0
487860	110	0	1	1	0	0	0	0	0	0	0	0	0	0	0	2	1	0	0	0	0	0	0	0
692986	111	0	1	1	0	0	1	0	0	0	0	0	0	0	0	2	1	0	0	0	0	0	0	0
731085	112	0	1	1	0	1	1	0	1	1	0	1	0	0	1	0	1	0	0	0	0	0	0	0
628846	113	0	0	1	0	0	0	0	0	0	0	0	0	0	0	2	1	2	0	0	0	0	0	0
1439500	114	0	0	1	0	0	0	0	0	0	0	0	0	0	0	0	0	0	2	0	0	0	0	0
1494632	115	0	0	0	0	0	0	0	0	0	0	0	0	0	0	0	0	0	0	0	0	0	2	0
689793	116	0	0	1	0	0	0	0	0	0	0	0	0	0	0	0	1	0	0	0	0	0	0	0
1205671	117	0	1	0	0	0	0	0	0	0	0	0	0	0	0	0	0	0	0	0	0	0	0	0
1355841	118	0	1	1	0	0	0	0	0	0	0	0	0	0	0	0	1	0	0	0	0	0	0	0
1439106	119	0	1	1	0	0	0	0	0	0	0	0	0	0	0	0	0	0	2	0	0	0	0	0
1682604	120	0	1	1	0	0	0	0	1	1	2	0	1	1	1	0	1	0	0	0	0	0	0	0
1455190	121	0	0	1	0	0	0	0	0	0	0	0	0	0	0	0	0	0	0	0	0	0	0	2
1274692	122	0	1	1	0	0	0	0	0	0	0	0	0	0	0	2	1	0	0	0	0	0	0	0
1428200	123	0	0	1	0	0	0	0	1	1	0	0	0	0	1	0	0	0	0	0	0	0	0	0
794529	124	0	1	1	0	0	0	0	0	1	0	0	0	0	0	2	1	0	0	0	0	0	0	0
1401063	125	0	0	0	0	0	0	0	0	0	0	0	0	0	0	0	0	0	0	0	0	0	2	0
1317867	126	0	0	1	0	0	0	0	0	1	0	0	0	0	1	0	0	0	0	0	0	0	0	0
1648333	127	0	1	1	0	1	0	0	0	0	0	1	0	0	0	0	0	0	0	0	0	0	0	0
1217003	128	0	0	1	0	0	0	0	1	0	0	1	0	0	1	2	1	0	0	0	0	0	0	0
1280001	129	0	1	1	0	0	0	0	0	0	0	0	0	0	0	2	1	0	0	0	0	0	0	0
1143136	130	0	1	1	0	0	0	0	0	1	0	0	1	2	0	0	0	0	0	1	1	0	0	0
603864	131	0	1	1	0	0	0	0	2	2	0	2	0	0	0	0	0	0	0	0	0	0	2	0
1486372	132	0	0	0	0	0	0	0	0	0	0	0	0	0	0	1	1	0	0	0	0	0	0	0
1515916	133	0	1	1	0	1	0	2	1	0	0	0	0	0	1	2	1	0	0	0	0	0	0	0
1261049	134	0	0	1	0	0	0	0	0	1	0	0	1	0	1	2	1	2	0	0	0	0	0	0
1318762	135	0	1	0	0	0	0	0	0	0	0	0	0	0	0	0	0	0	0	0	0	0	2	0
1362088	136	0	0	0	0	0	0	0	1	1	0	0	0	1	1	0	0	0	0	0	0	0	0	0
1045248	137	0	0	0	0	2	0	0	0	0	0	0	0	0	0	2	1	2	0	0	0	0	0	0
1217563	138	0	0	0	0	0	0	0	0	0	0	0	0	0	0	0	1	0	2	0	0	0	0	0
1245724	139	0	1	1	0	0	0	0	0	0	0	0	0	0	0	2	1	0	0	0	0	0	0	0
1313924	140	0	0	0	0	0	0	0	0	0	0	0	0	0	0	0	0	0	0	1	0	0	2	0
1361206	141	0	1	0	0	0	0	0	0	0	0	0	0	0	0	0	0	0	0	0	0	0	0	0
742176	142	0	0	0	0	0	0	0	0	0	0	0	0	0	0	2	1	0	2	0	0	0	2	0
794953	143	0	1	0	0	0	0	0	0	0	0	0	0	0	0	0	0	0	2	0	0	0	0	0
1260634	144	0	0	0	0	0	0	0	0	0	0	0	0	0	0	0	1	0	0	0	0	0	2	0
1277427	145	0	0	1	0	0	0	0	0	0	0	0	0	0	0	2	1	2	0	0	0	0	0	0
1280486	146	0	1	0	0	0	1	0	0	0	0	1	0	1	0	0	1	0	0	0	0	1	0	0
1281843	147	0	1	1	0	0	0	0	0	0	0	0	0	0	0	2	1	0	0	0	0	0	0	0
1253344	148	0	1	1	0	2	0	0	0	0	0	0	0	0	0	0	0	0	0	0	0	0	0	0
1199803	149	0	0	1	0	0	0	0	0	1	0	1	1	0	0	0	1	0	0	0	0	0	0	0
1578539	150	0	0	0	0	0	0	0	0	0	0	0	0	0	0	0	1	0	0	0	1	0	0	0
1236517	151	1	0	0	0	2	1	0	0	1	0	0	1	0	0	2	1	0	1	0	0	0	0	0
1236735	152	1	0	0	0	2	1	0	1	0	0	1	0	0	0	0	0	0	0	1	1	0	0	2
1237098	153	1	0	1	1	0	0	0	1	1	1	0	1	0	1	0	0	0	1	0	0	0	2	0
1238427	154	1	1	1	0	0	0	0	0	0	0	0	0	0	0	0	0	0	0	0	0	0	0	0
1239364	155	1	0	0	0	2	1	0	2	1	1	0	1	2	2	0	0	1	0	1	1	0	0	2
1240311	156	1	1	1	0	1	0	0	0	0	0	0	0	0	0	0	0	1	0	1	0	0	2	2
1240725	157	1	0	1	1	0	0	0	0	0	0	0	1	0	0	2	1	0	0	0	0	0	0	0
1240726	158	1	0	1	2	0	1	0	0	0	0	2	0	2	0	0	1	0	0	0	0	0	0	0
1241020	159	1	1	1	0	2	1	0	2	0	0	0	0	2	2	0	0	0	0	0	0	0	2	0
1241116	160	1	0	1	0	2	0	0	0	1	0	1	1	2	2	0	1	0	0	2	2	0	0	2
1241181	161	1	0	1	0	2	0	0	0	0	0	0	0	0	0	0	1	0	0	1	0	0	0	0
1241398	162	1	0	1	1	0	1	0	0	1	0	0	1	0	0	0	0	0	0	0	1	0	0	0
1241450	163	1	0	1	0	0	0	0	2	1	0	0	1	0	2	0	1	0	0	0	0	0	0	2
1241583	164	1	0	0	1	2	0	0	1	1	0	0	1	0	1	2	1	0	0	0	0	0	0	0
1241736	165	1	0	1	0	2	0	0	0	1	0	0	1	0	0	0	0	0	0	0	0	0	0	0
1241775	166	1	0	1	0	0	0	0	0	0	1	0	1	2	0	0	1	0	0	0	0	0	0	0
1241963	167	1	1	0	1	2	1	0	0	1	1	0	1	2	0	0	1	0	1	0	0	0	0	2
1242114	168	1	0	1	0	0	0	0	0	1	1	0	1	0	0	0	1	0	0	1	1	0	0	0
1242397	169	1	0	1	0	2	1	0	0	1	2	1	1	0	0	0	1	0	1	0	0	0	0	0
1242556	170	1	0	0	0	2	0	0	0	0	0	0	0	0	0	0	0	0	0	0	0	0	0	0
1242558	171	1	1	1	0	0	0	0	1	1	0	0	1	0	1	0	0	0	0	0	0	0	0	0
1242582	172	1	1	0	0	2	0	0	0	1	0	1	1	2	0	2	1	1	1	2	2	0	0	0
1242780	173	1	0	1	1	2	0	0	2	1	0	1	1	0	2	0	0	0	0	0	1	0	0	0
1242788	174	1	0	1	0	2	1	1	0	0	0	0	0	0	0	0	0	0	0	0	0	0	0	0
1242851	175	1	0	1	0	2	0	0	0	0	0	1	0	0	0	0	0	0	0	0	0	0	0	0
1242887	176	1	0	0	0	2	0	0	0	1	1	0	1	2	0	0	0	0	0	1	0	0	0	0
1243030	177	1	1	1	1	0	0	0	0	0	0	0	0	0	0	0	0	0	0	0	0	0	0	2
1243435	178	1	0	1	0	0	0	0	0	0	1	1	1	0	0	2	1	0	0	1	0	0	0	1
1243480	179	1	0	1	0	0	0	0	0	1	0	0	1	1	0	0	0	0	0	0	0	0	0	0
1243784	180	1	1	1	0	0	0	1	0	1	2	0	0	0	0	0	0	0	0	0	0	0	0	0
1243828	181	1	0	1	0	2	1	0	0	1	0	0	1	2	0	0	0	0	0	0	0	0	2	0
1243865	182	1	0	1	0	0	0	0	0	0	0	0	0	0	0	0	0	0	0	0	0	0	0	0
1243878	183	1	0	1	0	0	0	0	0	0	1	0	0	0	0	0	0	1	0	0	0	0	2	0
1244044	184	1	0	0	0	0	0	0	0	0	0	0	0	0	1	0	0	0	0	0	0	0	0	0
1244050	185	1	0	1	1	0	0	0	0	1	0	0	1	0	0	0	1	0	0	0	0	0	0	0
1244294	186	1	0	1	0	0	1	0	2	0	2	1	0	0	2	0	0	2	0	2	0	0	0	0
1244510	187	1	0	0	0	0	1	0	1	0	0	0	1	0	1	0	0	0	0	0	0	0	2	0
1244573	188	1	1	1	1	0	0	0	1	1	0	0	1	0	1	0	1	0	0	1	1	0	0	0
1245004	189	1	0	1	0	0	1	0	0	0	1	0	0	0	0	0	1	0	0	0	0	0	0	0
1245425	190	1	1	1	0	0	0	0	0	1	1	0	1	0	0	0	1	0	0	0	0	0	0	0
1245511	191	1	1	0	0	0	1	0	1	1	0	0	1	1	0	0	1	2	0	0	0	0	0	0
1245562	192	1	0	0	0	0	0	0	0	0	1	0	1	0	0	0	1	0	0	0	0	0	0	0
1245586	193	1	0	1	1	0	0	0	0	0	0	0	0	0	0	0	0	0	0	0	0	0	0	0
1245764	194	1	0	1	1	0	1	0	0	0	0	0	0	0	0	0	0	0	0	0	0	0	2	0
1245827	195	1	0	0	0	0	0	0	0	0	0	1	0	0	0	0	0	0	0	0	0	0	0	2
1245914	196	1	0	1	0	0	1	0	0	0	2	0	0	0	0	0	1	0	0	0	0	2	0	0
1245998	197	1	0	0	0	0	0	0	1	1	0	1	1	1	0	0	1	1	1	2	0	0	0	0
1246020	198	1	1	0	1	2	0	0	0	1	0	0	1	2	0	0	1	0	0	1	1	0	0	2
1246089	199	1	0	0	1	2	0	0	2	1	0	0	1	0	2	0	1	0	0	0	0	0	0	0
1246967	200	1	0	0	0	0	0	0	0	0	1	0	0	0	0	0	1	0	0	0	0	0	2	0
1247083	201	1	1	1	0	0	1	1	0	1	1	1	1	1	0	0	0	0	0	1	1	0	0	0
1247095	202	1	1	0	0	0	0	0	0	0	1	0	1	0	0	0	0	1	0	0	0	0	2	0
1247338	203	1	1	1	1	0	0	0	0	0	0	0	0	0	0	2	1	0	0	0	0	0	0	0
1247380	204	1	0	0	1	0	0	0	0	0	0	0	0	0	1	2	1	0	1	0	0	0	0	0
1247419	205	1	1	0	1	0	0	0	0	1	0	0	0	0	0	0	0	0	0	0	0	0	0	0
1247442	206	1	0	0	1	0	0	0	0	0	0	0	1	0	0	2	1	0	0	0	0	0	0	0
1247495	207	1	0	1	1	0	0	0	0	1	0	0	1	0	0	0	0	0	1	0	0	0	0	0
1247506	208	1	0	0	1	0	0	0	0	1	0	0	1	0	0	0	0	0	0	0	0	0	2	1
1247553	209	1	0	0	0	0	0	0	0	0	0	0	0	0	0	0	1	0	1	0	2	0	0	0
1247691	210	1	1	1	0	0	0	0	0	0	0	0	0	0	0	0	0	0	0	0	0	0	0	0
1247850	211	1	0	1	0	0	0	0	0	1	0	0	1	0	1	0	1	0	0	0	0	0	0	1
1247870	212	1	1	0	0	0	0	0	0	1	0	0	1	0	0	0	0	0	0	0	0	0	0	1
1247892	213	1	0	0	0	2	0	0	0	1	0	1	1	0	0	0	0	0	0	0	0	0	0	1
1247909	214	1	0	1	0	0	1	0	0	1	1	1	1	2	0	0	0	0	0	1	0	0	0	2
1247918	215	1	0	1	1	0	0	0	0	0	0	0	0	0	0	0	0	0	0	0	0	0	0	0
1247952	216	1	1	1	1	0	0	0	0	0	0	0	0	0	1	0	0	0	0	0	0	0	0	0
1248009	217	1	0	1	1	2	1	0	0	1	0	0	1	0	0	0	0	0	0	0	0	0	0	0
1248072	218	1	0	1	1	0	0	0	0	0	0	0	0	0	0	0	1	0	0	0	0	0	2	0
1248119	219	1	0	1	1	0	1	0	0	1	0	1	0	0	0	0	0	0	0	0	0	0	0	1
1248123	220	1	0	1	0	2	0	0	0	1	0	0	1	0	0	2	1	0	0	1	0	0	0	0
1248142	221	1	1	1	0	0	1	0	0	1	1	1	1	0	0	0	0	1	0	1	1	0	1	0
1248204	222	1	0	1	0	0	0	0	0	1	0	1	1	0	0	0	1	0	0	0	0	0	0	0
1248507	223	1	0	1	1	0	0	0	0	0	0	0	0	0	0	2	1	0	0	2	0	0	2	0
1248521	224	1	0	1	1	2	0	0	2	0	0	2	0	2	0	2	1	0	0	0	0	2	0	0
1248758	225	1	1	1	1	0	1	0	0	1	0	0	1	0	0	0	0	0	0	0	0	0	0	0
1249475	226	1	0	1	0	2	0	1	0	0	0	0	0	0	0	0	0	0	0	0	0	0	0	0
1249602	227	1	0	1	0	2	1	0	2	0	1	0	0	2	2	2	1	1	0	0	0	0	2	2
1249632	228	1	1	1	0	0	1	0	0	1	0	0	1	0	0	0	0	0	0	0	0	0	0	2
1250325	229	1	0	1	1	2	0	0	0	1	0	0	1	0	0	0	1	0	0	0	0	0	0	0
1250515	230	1	0	1	0	0	1	0	0	1	1	1	1	0	0	0	0	0	0	0	1	0	0	0
1250750	231	1	0	1	0	2	1	0	2	1	1	1	1	2	2	1	1	0	0	1	0	0	0	2
1250810	232	1	0	1	0	2	0	1	0	1	2	0	0	0	0	2	0	0	0	2	0	0	0	0
1250881	233	1	1	0	0	2	0	0	0	0	0	0	1	0	2	0	0	0	0	0	0	0	0	0
1251151	234	1	1	0	1	0	1	0	0	1	1	0	1	0	1	0	0	0	0	0	0	0	0	0
1251385	235	1	0	1	0	0	0	0	2	1	0	1	1	0	2	0	0	0	0	1	0	0	0	0
1251572	236	1	0	1	1	0	0	0	0	0	0	2	0	0	0	0	1	0	0	0	0	0	2	0
1251766	237	1	0	1	1	2	1	0	0	1	0	0	0	0	0	0	0	0	0	0	0	0	0	0
1251978	238	1	1	1	1	0	0	0	0	0	0	0	0	0	0	2	1	0	0	0	0	0	0	0
1252262	239	1	0	1	0	0	0	1	0	0	0	1	0	0	0	0	1	0	0	0	0	0	0	2
1252297	240	1	0	1	1	2	0	0	0	1	0	0	1	0	0	0	0	0	0	0	0	0	0	0
1252435	241	1	0	1	0	2	0	0	0	0	0	0	1	2	2	0	0	1	0	0	0	0	0	0
1252574	242	1	0	1	0	0	1	0	0	1	0	0	1	0	0	0	0	0	0	0	0	0	0	0
1252601	243	1	0	1	0	0	0	0	0	1	1	1	1	0	0	0	1	0	0	1	0	0	0	0
1252666	244	1	0	1	1	0	0	1	0	1	2	0	1	0	1	0	0	0	0	2	0	1	0	0
1252950	245	1	0	1	0	0	0	0	0	1	0	0	1	0	0	0	0	0	0	0	0	1	0	2
1252974	246	1	1	1	0	0	0	0	0	1	0	0	1	0	0	0	0	0	0	0	0	0	0	1
1253223	247	1	1	1	0	0	0	0	0	1	1	0	1	2	1	0	0	0	0	0	0	0	2	0
1253252	248	1	0	1	2	1	1	0	0	0	0	0	0	1	0	2	1	0	1	0	0	0	0	0
1253431	249	1	0	1	0	2	1	1	0	0	1	0	1	2	0	0	0	0	0	0	0	0	0	0
1253510	250	1	0	0	1	0	0	0	0	1	0	0	1	0	0	2	1	0	0	0	0	0	0	0
1253613	251	1	1	0	1	2	0	0	2	1	1	0	1	2	2	2	1	0	0	0	0	0	0	0
1253859	252	1	1	1	0	0	0	0	0	0	0	0	0	0	0	0	1	0	0	1	1	0	0	0
1254192	253	1	1	1	1	0	0	0	0	1	0	0	1	0	0	2	1	0	0	0	0	0	0	0
1254511	254	1	0	1	1	0	1	0	0	1	0	1	1	0	0	2	1	0	1	1	1	0	0	0
1254575	255	1	0	1	2	0	1	0	2	1	1	1	1	1	2	1	1	1	0	2	2	1	0	2
1254608	256	1	0	0	1	0	0	0	0	0	0	0	0	0	0	0	1	0	0	0	0	0	2	2
1254683	257	1	1	1	1	0	0	0	0	0	0	0	0	0	0	2	1	0	0	0	0	0	2	0
1254782	258	1	0	1	0	0	0	0	0	1	0	0	1	0	0	0	0	0	0	1	0	0	0	0
1254933	259	1	0	1	0	0	0	0	0	0	1	1	1	0	0	0	0	0	0	0	0	0	0	0
1254968	260	1	1	0	0	0	0	0	0	0	0	0	0	0	0	0	1	0	0	0	0	0	0	0
1255028	261	1	0	1	0	0	0	0	2	1	1	0	1	2	2	0	0	0	0	0	0	0	0	0
1255122	262	1	0	1	0	2	1	0	0	1	0	0	0	0	2	2	1	0	0	0	0	0	0	0
1255211	263	1	1	1	1	2	0	0	0	0	0	0	0	0	0	0	0	0	0	0	0	0	0	0
1255220	264	1	0	1	0	0	0	0	0	0	0	0	0	0	0	0	1	0	0	0	0	0	0	0
1255319	265	1	1	1	0	0	1	0	2	1	1	1	1	0	2	0	1	0	0	0	0	2	0	0
1255401	266	1	0	1	0	0	0	0	0	0	1	0	1	0	0	2	1	0	0	0	1	0	1	0
1255500	267	1	0	1	0	0	0	1	0	1	0	0	1	0	0	0	0	0	0	1	0	0	0	0
1256176	268	1	0	1	1	0	0	0	0	1	0	0	1	2	0	0	0	0	0	0	0	0	0	0
1256291	269	1	1	0	0	0	0	0	1	0	1	0	1	0	1	0	0	0	0	1	0	0	0	0
1256409	270	1	1	1	1	0	0	0	0	0	0	0	0	0	0	0	1	0	0	0	0	0	0	2
1256452	271	1	1	1	0	0	0	0	0	0	0	0	0	2	0	0	1	0	0	0	0	0	0	0
1256514	272	1	0	1	1	0	1	0	0	1	0	0	0	0	0	2	1	0	0	0	0	2	0	0
1256571	273	1	0	1	0	2	1	1	0	0	0	1	0	0	2	2	1	0	0	0	0	0	0	0
1256780	274	1	0	0	1	0	0	0	0	1	0	0	1	0	0	2	1	0	0	0	0	0	0	0
1256979	275	1	0	1	0	0	0	0	2	0	0	0	0	0	2	0	0	0	1	1	0	0	0	2
1257119	276	1	0	0	0	0	1	0	0	1	0	0	1	0	0	0	0	1	0	1	0	0	2	2
1257286	277	1	1	0	1	0	1	0	0	1	0	0	1	0	1	0	1	0	0	0	0	0	0	0
1257485	278	1	1	0	1	0	0	0	0	1	0	0	1	2	0	0	1	0	0	0	0	0	0	0
1257503	279	1	1	0	1	0	0	0	0	1	0	0	0	0	0	0	1	0	0	0	0	0	0	0
1257616	280	1	0	1	1	0	0	0	0	1	0	0	1	0	0	0	1	0	0	0	0	0	0	0
1257948	281	1	0	1	0	0	0	0	0	0	0	0	0	0	0	2	1	0	0	0	0	0	0	0
1257952	282	1	0	1	1	0	0	0	0	0	0	0	0	0	0	2	1	0	0	0	0	0	0	0
1258063	283	1	1	0	2	2	1	0	0	1	0	1	1	0	0	2	1	0	1	2	2	0	0	0
1258152	284	1	0	1	0	0	0	0	0	0	0	0	0	0	0	0	0	0	0	0	0	0	0	0
1258646	285	1	0	0	2	2	1	0	0	0	1	0	1	0	0	0	1	1	0	0	0	0	0	0
1259140	286	1	0	0	0	0	0	0	0	0	0	0	0	0	0	0	0	0	0	0	0	0	0	0
1259257	287	1	0	1	0	0	0	0	0	0	0	0	0	0	0	0	0	0	0	0	0	0	0	0
1259308	288	1	0	1	1	0	1	0	0	1	0	1	1	0	0	0	0	1	0	0	0	0	0	1
1259383	289	1	0	1	0	0	1	0	0	1	0	0	1	0	0	0	0	0	0	0	0	0	0	0
1259442	290	1	1	1	0	0	1	0	0	0	0	1	0	0	2	0	0	0	0	0	0	0	0	2
1260199	291	1	0	0	0	0	0	0	0	0	0	0	0	0	0	2	1	0	0	0	0	0	0	0
1260324	292	1	0	0	0	2	0	0	0	0	0	0	1	0	0	0	0	0	0	0	0	0	0	0
1260352	293	1	0	1	1	0	0	0	0	1	1	0	1	2	0	0	0	0	0	0	0	0	2	0
1260563	294	1	0	0	0	0	1	0	0	1	0	0	0	0	0	0	1	0	0	0	0	0	0	0
1260666	295	1	0	0	0	2	0	0	0	0	0	0	0	0	0	0	0	0	0	0	0	0	0	0
1260753	296	1	0	0	1	0	0	0	0	0	0	0	0	0	0	2	1	0	0	0	0	0	2	0
1260883	297	1	0	1	0	0	0	0	0	0	0	0	1	0	0	0	0	0	0	0	0	0	0	0
1261080	298	1	0	1	0	0	1	0	0	1	0	0	0	2	0	0	0	0	0	0	0	0	0	0
1261094	299	1	1	1	0	2	0	0	0	0	0	0	0	0	0	0	0	0	0	0	0	0	0	0
1261196	300	1	0	1	1	0	1	0	1	1	1	1	1	0	0	0	1	0	0	1	1	0	0	1
1261205	301	1	0	1	1	0	1	0	0	0	0	0	1	0	0	2	1	0	0	0	0	0	0	0
1261223	302	1	1	0	0	2	1	0	2	1	0	1	1	0	2	0	0	0	0	2	2	0	0	0
1261286	303	1	0	0	1	0	0	0	0	0	0	0	0	0	0	2	1	0	0	0	0	0	0	0
1261432	304	1	1	1	0	0	0	0	0	1	0	0	1	0	0	0	0	0	0	0	0	0	0	1
1261555	305	1	0	1	0	2	1	0	2	1	0	1	1	0	2	0	0	0	0	0	2	0	0	2
1261681	306	1	1	1	0	0	0	0	0	1	2	0	0	0	0	0	1	0	0	0	0	0	0	0
1261799	307	1	1	0	0	2	1	0	2	0	0	0	0	2	2	0	1	0	0	0	2	0	2	0
1261827	308	1	0	1	0	0	0	0	0	0	0	0	0	0	0	0	0	0	0	0	0	0	0	0
1262012	309	1	0	1	0	0	0	0	0	0	0	0	0	0	0	0	0	0	0	0	0	0	2	0
1262304	310	1	0	1	1	0	1	0	0	0	2	0	0	0	0	2	0	2	0	0	0	0	0	0
1262393	311	1	0	0	1	0	0	0	0	0	0	0	0	0	0	0	1	0	0	0	0	0	0	2
1262693	312	1	0	1	0	0	1	0	0	1	0	1	1	0	0	2	1	1	0	2	2	0	0	1
1262711	313	1	0	1	1	2	1	0	0	1	0	1	1	2	0	2	1	0	0	0	0	0	0	0
1262876	314	1	0	0	1	0	0	0	0	1	1	0	1	2	0	0	0	0	0	0	0	0	0	0
1263037	315	1	1	0	0	0	1	0	1	1	0	0	1	0	0	1	1	0	0	0	0	0	0	0
1263406	316	1	1	1	1	0	0	0	2	0	0	2	0	0	0	2	1	0	0	0	0	0	0	0
1263481	317	1	0	0	0	2	0	0	0	1	1	0	1	2	0	0	1	0	0	1	0	0	0	0
1263485	318	1	0	1	1	0	1	0	1	1	2	0	0	1	1	0	0	0	0	2	2	0	2	0
1263495	319	1	1	1	1	0	0	0	0	0	0	1	0	0	0	2	1	0	0	0	0	0	0	0
1263735	320	1	1	1	1	0	1	1	0	0	0	0	0	0	0	2	1	0	0	2	2	0	0	0
1263942	321	1	1	1	0	0	0	0	0	0	0	0	0	0	0	2	1	0	0	0	0	0	0	0
1264417	322	1	1	1	1	2	1	0	0	1	0	0	1	0	0	0	1	0	0	0	0	0	2	0
1264448	323	1	0	1	0	0	1	0	0	1	0	0	1	2	0	0	1	1	0	0	0	0	0	0
1264717	324	1	0	1	0	0	0	0	0	1	0	0	1	0	1	0	0	0	0	0	0	0	0	0
1264875	325	1	0	1	0	0	1	0	0	1	1	0	1	0	0	0	0	0	0	0	0	0	0	0
1265036	326	1	1	1	1	0	0	0	0	0	0	0	0	0	0	0	1	0	0	0	0	0	0	2
1265129	327	1	1	1	1	0	0	0	0	0	0	0	0	0	0	2	1	0	0	0	0	0	0	0
1265134	328	1	0	1	1	0	0	0	0	1	1	1	1	0	0	0	0	0	0	0	0	0	0	1
1265187	329	1	1	1	1	0	1	0	0	0	0	0	0	0	0	2	1	0	0	0	0	0	2	0
1265302	330	1	0	1	1	0	0	0	0	0	0	0	1	0	0	0	0	0	0	0	0	0	0	0
1265412	331	1	0	1	1	0	0	0	0	0	0	0	0	0	0	0	0	0	0	0	0	0	0	0
1266256	332	1	0	1	0	0	1	0	0	1	1	0	1	0	0	0	1	0	0	1	0	0	0	0
1266544	333	1	0	1	0	2	1	0	0	1	2	0	1	0	0	0	0	0	0	0	0	0	0	0
1267105	334	1	0	1	0	0	1	0	0	1	1	1	1	0	0	0	0	0	0	0	0	0	0	0
1267119	335	1	0	1	0	0	0	0	0	1	1	0	1	0	0	0	1	0	0	1	0	0	0	2
1267157	336	1	0	1	1	0	0	0	0	1	0	0	1	0	0	0	0	0	0	0	2	0	0	0
1267230	337	1	0	1	1	0	1	0	0	1	0	0	1	0	0	0	0	0	0	0	0	0	0	0
1267720	338	1	0	0	0	0	0	1	0	0	0	0	0	0	0	0	1	0	0	0	1	0	0	0
1268056	339	1	1	0	0	0	1	0	0	0	0	1	0	0	0	0	0	0	0	0	0	0	0	0
1268284	340	1	0	1	0	0	0	0	0	0	0	0	0	0	0	0	0	0	0	0	0	0	0	0
1268458	341	1	1	1	0	2	0	0	0	0	0	0	0	2	0	2	1	0	0	0	0	0	0	0
1268620	342	1	0	1	0	0	1	0	0	1	0	1	1	0	2	0	1	0	1	2	0	0	2	0
1268648	343	1	0	1	0	0	0	0	0	1	0	0	1	0	0	0	1	0	0	1	1	0	0	0
1268880	344	1	0	1	1	0	1	0	1	1	0	0	1	0	1	0	1	0	0	0	0	0	0	0
1268992	345	1	1	0	0	0	0	0	0	0	0	0	0	0	0	0	0	0	0	0	0	0	0	0
1269016	346	1	0	1	0	1	1	0	0	1	0	1	1	0	0	0	1	0	0	1	0	0	2	1
1269089	347	1	0	0	1	0	0	0	0	0	0	0	0	0	2	2	1	0	0	0	0	0	0	2
1269197	348	1	0	1	1	0	0	0	0	0	0	0	0	2	0	2	1	0	0	0	0	0	2	0
1269220	349	1	0	1	1	0	0	0	0	1	1	0	1	2	0	0	0	0	0	0	0	0	0	0
1269658	350	1	0	1	0	0	0	0	0	0	1	0	1	0	0	0	0	0	0	0	0	0	0	0
