# Supplementary material for: Development of a Nomogram for Predicting the Risk of Carcinoma in Chronic Atrophic Gastritis
Source: Research Square preprint supplement (doi:10.21203/rs.3.rs-5554170/v1), 2025-04-14
Supplement: Supplementary file 2 [file d792d0e41d6ac18ba81ef0b3.xlsx]

## Sheet: Sheet1
id	id	status	gender	year	Prothrombin_time(sec)	fibrinogen(g/L)	D_dimer(ng/mL)	TT_ratio	White_blood_cell_count(·109/L)	Red_blood_cell_count(·109/L)	Mean_corpuscular_volume(fL)	Lymphocyte_count(·109/L)	haemoglobin(g/L)	platelet(·109/L)	Neutrophil_count(·109/L)	cholesterol(mmol/L)	Low_density_lipoprotein(mmol/L)	high_density_lipoprotein(mmol/L)	Triglycerides(mmol/L)	Aspartate_aminotransferase(U/L)	Alanine_aminotransferase(U/L)	potassium(mmol/L)	uric_acid(μmol/L)	glucose(mmol/L)
597434	1	CAG	female	75	10.8	2.21	270	1.08	4.57	4.44	91.9	2	139	217	2.07	4.27	2.2	1.74	1.04	23	25	3.92	355	4.89
1328994	2	CAG	male	57	9.9	2.6	310	1.13	5.37	5	92.4	1.21	159	230	3.35	3.62	2.05	1.29	0.76	35	34	4.58	388	5.81
696029	3	CAG	female	76	9.9	2.44	220	1.15	4.55	4.53	93.4	1.4	137	247	2.88	5.16	2.79	1.69	1.87	23	26	4.42	368	5.97
1897680	4	CAG	female	59	9.6	2.91	300	1.08	4.98	4.02	96.4	1.96	132	195	2.79	4.17	2.01	1.7	0.59	19	30	3.63	261	4.61
1591773	5	CAG	male	60	10.7	3.02	320	1.17	6.78	4.46	92.2	2.35	138	221	3.79	3.76	2.49	0.91	0.89	17	22	4.29	279	4.18
1287967	6	CAG	male	64	9	3.7	220	1.12	4.51	4.42	88	1.26	136	198	2.82	3.85	1.95	1.17	0.96	17	14	4.08	209	5.1
1457484	7	CAG	male	66	8.8	2.34	90	1.28	6.37	4.43	93	2.3	141	204	3.32	4.35	2.6	1.2	1.2	16	13	4.31	330	5.65
1410360	8	CAG	male	67	10.4	2.91	290	1.11	6.61	5.14	87	1.98	156	227	4.1	4.59	2.83	1.45	1.39	19	13	3.96	415	5.14
1607621	9	CAG	female	59	10.7	2.74	300	1.12	7.46	4.79	87.1	1.75	139	223	5.15	3.89	2.46	1.27	0.58	22	24	3.95	291	4.64
1426403	10	CAG	female	68	10.3	2.81	110	1.08	6.57	5.04	95.2	1.61	155	232	4.57	4.85	2.81	1.69	0.8	16	12	4.17	258	6.06
1179655	11	CAG	male	80	10.8	3.01	220	1.06	8.14	4.56	92.5	2.17	148	199	5.4	4.17	2.35	1.31	1.74	17	16	4.42	314	4.67
1416803	12	CAG	male	52	11.2	2.19	290	1.18	4.53	4.48	91.7	1.86	137	171	2.29	3.89	2.47	1.13	0.78	16	17	3.77	348	4.38
1179953	13	CAG	male	53	10.6	2.35	50	1.17	4.3	4.11	88.6	1.42	131	178	2.51	4.02	2.43	1.23	0.65	17	27	3.9	409	4.44
1383518	14	CAG	male	61	9.6	2.17	1640	1.05	4.91	4.89	95.7	2.13	157	267	2.27	4.89	2.65	1.96	0.67	18	11	4.31	237	4.33
1682231	15	CAG	male	64	10.9	2.91	360	1.15	8.76	5.06	92.3	3.04	157	206	4.79	4.55	2.81	1.2	1.2	22	28	4.32	408	5.72
699187	16	CAG	male	77	10	2.8	240	1.22	5.32	4.65	97	2.59	149	197	2.19	5.53	3.02	1.78	1.32	19	13	4.22	346	5.07
1215087	17	CAG	male	75	10.4	4.37	260	1.05	5.74	4.66	88.4	0.95	139	187	4.18	5.61	3.28	1.44	1	20	13	4.19	378	4.27
1596086	18	CAG	female	51	9.1	2.72	320	1.24	4.95	4.04	95.5	1.38	126	321	2.86	5.61	2.84	1.7	1.11	25	14	4.34	317	4.92
1551059	19	CAG	female	53	9.7	2.62	250	1.25	4.85	4.11	90.5	1.98	125	239	2.28	4.4	2.31	1.79	0.53	24	18	3.78	222	4.66
1062676	20	CAG	female	61	12.7	2.78	260	0.97	4.08	4.61	83.7	0.99	128	161	2.44	5.2	3.07	1.72	0.82	24	27	4.13	222	5.03
1881152	21	CAG	female	58	11.4	2.2	170	1.11	6.59	3.77	94.7	3.32	120	297	2.58	4.65	2.74	1.23	1.43	21	12	3.9	284	4.17
796074	22	CAG	male	68	9.7	2.47	340	1.21	3.52	4.13	95.6	1.25	133	121	2	3.95	2.18	1.4	0.62	19	13	4.16	186	4.58
1556670	23	CAG	male	63	9.4	2.21	230	1.23	9.52	6.26	66.4	2.47	129	359	6.14	4.22	2.35	1.24	0.94	19	29	4.34	332	5.57
794125	24	CAG	male	65	9.3	2.83	300	1.25	3.93	4.74	94.7	1.67	147	147	1.78	5	2.88	1.53	1.34	20	22	4.12	370	5.21
1701477	25	CAG	male	54	10.6	2.24	260	1.09	4.15	5.1	87.3	1.91	151	236	1.79	4.11	2.38	1.17	0.75	23	21	4.35	308	4.54
1454007	26	CAG	female	61	8.6	2.38	190	1.4	4.59	3.99	93.2	1.82	121	259	1.55	5.4	3.28	1.75	0.78	35	45	4.51	328	4.59
936716	27	CAG	female	77	9.2	3.8	2560	1.17	4.69	4.45	90.3	2.84	127	213	1.4	5.11	2.54	1.43	0.89	20	16	3.85	228	4.2
1721688	28	CAG	female	62	8.6	2.71	370	1.11	4.12	4.56	89	2.4	133	185	1.4	9122	2.88	1.67	1.32	19	21	3.98	352	5.52
1146877	29	CAG	male	59	9.9	2.82	200	1.15	6.53	4.53	89	3.19	137	295	2.63	5.25	3.56	1.02	1.48	15	23	4.07	281	4.34
1595836	30	CAG	female	62	9.5	3.24	280	1.2	5.72	4.45	87.6	2.78	128	301	2.52	5.56	3.7	1.29	1.38	24	27	4.42	284	6.01
1610139	31	CAG	female	58	10.1	2.75	340	1.18	3.56	4.31	92.3	1.54	134	177	1.67	5.33	3.43	1.2	1.19	15	16	3.99	331	5.48
1538813	32	CAG	female	73	8	2.63	240	1.21	5.89	4.34	95.7	2.14	133	175	3.02	6.04	4.08	1.27	1.17	19	14	4.21	258	5.19
1324215	33	CAG	female	71	9.4	2.89	210	1.15	4.65	4.89	89.2	1.9	141	267	2.26	6.34	3.91	1.75	1.52	28	16	4.95	357	5.45
1617917	34	CAG	male	59	9	2.86	250	1.25	11.83	5.01	94.1	5.15	155	221	5.59	6.62	4.43	1.47	1.82	22	24	4.5	364	4.27
1182374	35	CAG	female	71	10.1	3.1	150	1.1	4.65	3.92	93.4	1.66	122	217	2.54	6.25	3.81	1.49	1.16	18	16	3.76	298	4.37
1264429	36	CAG	female	53	10.6	3.21	220	0.98	6.5	4.04	93.5	2.29	126	228	3.58	6.55	3.88	1.66	1.22	15	15	4.32	255	4.97
1433367	37	CAG	female	47	9.9	3.29	140	1.1	5.03	4.18	93.5	1.52	127	317	3.01	5.81	3.57	1.84	0.97	15	18	3.65	312	5.49
1065294	38	CAG	female	69	9.5	2.55	130	1.22	3.87	4.3	91.8	1.72	134	237	1.64	5.84	3.63	1.89	0.65	19	9	4.3	348	4.91
599241	39	CAG	female	53	9.4	2.46	190	1.34	4.46	3.94	96.4	2.53	127	274	1.46	6.23	3.88	1.89	0.74	25	28	4.11	230	4.6
1646261	40	CAG	male	60	10.6	3.06	300	1.14	6.24	4.45	93.5	1.99	147	170	2.73	2.58	1.49	0.79	0.79	22	22	3.95	368	4.74
1501814	41	CAG	female	61	9.5	2.09	260	1.38	3.79	4.82	89.4	1.21	143	177	2.32	4.47	1.97	2.22	0.62	17	14	3.87	183	5.5
1412248	42	CAG	female	63	10.4	2.04	140	1.17	5.2	4.19	91.6	2.18	124	193	2.43	5.59	3	2.13	1.05	15	16	4.42	263	4.88
1333197	43	CAG	female	58	9.9	3.6	230	1.08	4.8	4.37	92.7	2.85	131	223	1.36	5.49	2.82	2.09	0.71	22	15	3.73	412	4.03
1481984	44	CAG	female	70	8	2.72	100	1.31	6.05	3.57	90.9	2.07	108	223	3.36	5.91	3.32	2.04	1.68	22	13	4.02	164	4.45
1707439	45	CAG	female	71	10.2	2.98	380	1.1	3.48	3.97	96	0.85	127	161	2.34	5.9	3.26	2.16	1.11	17	13	3.86	278	4.89
1182442	46	CAG	female	70	10.6	2.73	370	1.12	3.63	4.55	89.9	1.58	133	150	1.7	5.74	2.96	2.07	0.53	22	13	3.92	196	4.77
1705888	47	CAG	female	67	9.8	3.42	290	1.13	4.86	4.42	93.5	2.03	139	277	2.43	6.94	4.18	2.35	1.03	26	25	4.18	230	5.12
1361898	48	CAG	female	66	10	3.08	110	1.06	7.18	4.47	90.7	2.23	136	256	4.63	7.19	4.28	2.02	0.97	24	25	4.16	218	5.39
1684197	49	CAG	female	66	8.4	2.22	330	1.25	5.53	3.71	93.7	2.34	114	245	2.23	6.66	4.07	2.19	0.57	21	14	3.81	271	4.26
1467621	50	CAG	female	68	9.1	2.55	50	1.26	3.27	3.81	90.8	1.41	112	172	1.48	5.8	3.47	12	1.72	18	15	4.04	252	4.64
1533080	51	CAG	female	68	9.3	2.62	160	1.17	6.91	4.57	91.5	2.89	140	261	3.26	4.93	2.88	1.3	2.1	21	24	4.51	334	5.81
790308	52	CAG	male	60	9.7	2.57	230	1.12	8.41	4.91	91.6	2.68	149	247	4.79	4.02	2.28	1.16	2.29	20	38	4.72	259	4.81
1144678	53	CAG	male	69	10.1	2.6	130	1.24	5.55	4.34	94.1	1.43	136	129	3.46	3.6	2.14	0.98	2.15	18	13	3.94	305	5.13
1553204	54	CAG	female	82	10.4	2.91	440	1.13	6.43	4.37	94.1	2.63	137	217	3.28	5.15	3.63	0.92	2.69	18	13	3.55	287	5.45
1292316	55	CAG	male	63	8.7	2.44	180	1.3	6.6	4.34	92.3	2.29	136	228	3.73	3.84	2.5	0.89	2	15	15	3.71	270	4.8
539397	56	CAG	male	83	10.4	2.73	280	1.23	4.96	4.41	89.8	1.79	132	195	2.62	3.22	1.47	1.42	0.61	14	13	3.52	290	4.77
1659682	57	CAG	male	47	11	1.79	270	1.42	4.4	4.49	84.1	2.1	129	187	1.9	3.03	1.51	1.17	0.94	14	10	3.8	292	4.42
1553766	58	CAG	female	59	9.2	2.51	240	1.19	4.53	4.09	97.1	2.12	128	200	1.89	4.65	3.2	1.29	0.73	14	13	4.05	308	4.28
1590934	59	CAG	female	51	9.2	2.63	280	1.32	4.83	4.37	87.4	1.46	118	289	2.94	5.04	3.15	1.38	0.87	13	9	4.03	233	4.82
1278196	60	CAG	male	79	10.4	3.68	350	1.09	9.86	4.44	88.3	1.98	131	226	6.35	5.29	3.16	1.35	1.36	12	9	4.35	288	4.79
1416034	61	CAG	female	67	9.6	2.83	120	1.12	4.37	4.64	94	1.89	139	213	2.19	6.06	2.94	1.58	0.84	13	11	4.33	386	4.26
549029	62	CAG	female	61	10	2.22	130	1.28	5.3	3.51	97.4	1.51	113	216	3.3	5.71	3.3	1.67	0.88	14	10	3.76	254	4.54
432163	63	CAG	female	84	10.6	2.45	160	1.18	5.07	4.21	91.7	2.16	132	173	2.41	4.76	2.52	1.76	1.36	18	7	4.11	157	4.37
656928	64	CAG	female	45	10.2	2.94	210	1.18	5.58	4.58	92	1.49	139	269	3.58	4.77	2.63	1.56	0.44	14	6	3.94	173	5.73
1514137	65	CAG	female	65	10.5	2.77	190	1.17	4.64	3.79	94.5	1.92	115	220	2.3	4.03	2.29	1.34	0.68	14	6	3.86	243	4.31
1463909	66	CAG	female	64	10.8	2.82	270	1.02	4.86	4.23	86.3	2.3	119	177	2.2	4.36	2.74	1.24	1.08	9	8	3.85	246	6.13
1596804	67	CAG	male	77	10.6	3.28	270	1.08	5.85	4.54	98.2	2.78	152	209	2.4	4.53	2.81	1.25	1.73	50	69	4.04	388	5.66
1326423	68	CAG	female	60	8.2	3.86	220	1.06	5.83	4.42	93.9	2.56	134	129	2.9	6.76	4.43	1.9	1.25	16	15	1.33	339	5.58
1380661	69	CAG	male	68	12.5	4.49	10880	1.25	13.14	2.04	96.6	1.14	63	159	11.09	2.83	1.36	0.66	1.45	11	14	3.28	177	5.65
502960	70	CAG	female	49	8	2.31	190	1.21	5.55	4.62	84	1.68	125	259	3.48	3.95	2.39	1.09	1.54	15	17	4.44	418	4.77
497333	71	CAG	male	60	10.2	2.62	330	1.26	6.08	4.88	89.6	2.25	150	180	3.27	5.37	3.84	1.16	1.51	22	24	4.12	450	4.08
1381152	72	CAG	male	56	8.8	2.29	180	121	7.32	4.71	95.5	3.01	153	212	3.16	5.39	3.22	0.86	7.32	20	40	4.41	457	6.16
1553724	73	CAG	male	63	11.5	1.91	200	1.22	6.39	4.8	91.5	2.44	152	202	3.18	4.03	2.76	0.84	2.42	29	36	4.11	479	4.21
1533899	74	CAG	male	51	9.5	3.17	190	1.06	4.66	5.22	88.3	1.5	159	172	2.75	4.85	3.33	1.13	1.18	13	14	3.82	473	4.32
1371316	75	CAG	male	72	10.1	3	420	1.11	7.56	4.41	85.1	2.18	128	245	4.36	4.34	2.85	0.9	2.05	14	14	4.34	516	5.96
1323527	76	CAG	female	64	9.1	2.95	130	1.23	5.16	3.92	89.6	1.43	117	203	3.28	4.01	2.05	1.07	2.65	22	31	3.44	478	5.56
1434553	77	CAG	female	57	8.8	2.59	130	1.22	5.18	4.45	88.4	2.11	131	212	2.46	5.54	3.65	1.25	1.18	27	30	4.06	349	3.67
1560559	78	CAG	female	51	9.1	2.65	220	1.12	5.52	3.74	95.2	1.8	113	179	2.96	5.52	2.31	2.55	0.76	21	14	4.07	305	3.87
1585406	79	CAG	female	67	8.6	3.37	220	1.12	5.9	4.72	93.1	2.41	146	243	3.02	4.01	2.02	1.4	0.99	23	28	4.57	401	6.55
1699703	80	CAG	male	60	8	2.28	300	1.14	5.3	5.48	88.2	1.7	171	250	3.18	4.76	2.97	1.17	1.6	16	22	4.15	273	9.51
677185	81	CAG	male	76	8.3	2.55	240	1.25	6.51	4.78	94.8	2.54	153	231	3.37	5.21	3.24	1.69	1.62	30	34	4.22	367	6.56
1431453	82	CAG	male	79	8.9	3	210	1.12	5.17	4.68	89.7	1.64	131	244	2.94	4.11	2.72	0.97	1.64	18	14	4.26	342	6.74
1370482	83	CAG	female	74	9	3.34	200	1.02	7.09	4.3	81.7	3.45	113	216	3.06	3.48	1.57	1.55	0.84	20	23	4.25	274	6.84
691553	84	CAG	female	65	8.8	2.53	130	1.12	4.43	4.58	87.3	1.56	136	212	2.36	5.94	3.7	1.68	2.14	32	49	4.03	410	6.6
1683318	85	CAG	male	62	11.8	3.1	490	1	4.33	3.4	105.5	1.11	118	98	2.45	3.32	1.76	1.1	0.58	58	50	4.4	359	6.34
1048870	86	CAG	male	68	12.2	3.7	710	1.17	5.53	4.67	89.7	1.99	145	251	2.86	5.25	3.42	1.37	1.37	23	28	4.23	470.2	6.4
763213	87	CAG	female	58	9.8	2.46	370	1.19	4.15	4.13	88.9	2.59	121	238	1.22	5.76	3.66	1.53	0.86	9	9	4.54	201	4.44
818055	88	CAG	female	59	10.6	3.16	270	1.12	4.75	4.52	95.6	1.5	144	273	2.89	8.29	5.28	1.79	0.79	15	20	4.03	252	4.97
1560559	89	CAG	female	48	9.1	2.65	220	1.12	5.52	3.74	95.2	1.8	113	179	2.96	5.52	2.31	2.55	0.76	14	21	4.07	305	3.87
1438337	90	CAG	male	81	11.8	2.36	160	1.11	4.99	4.8	93.3	0.92	159	221	3.65	5.48	3.32	1.61	0.76	25	28	4.34	337	6.87
1473442	91	CAG	male	51	11	3.57	70	1.01	7.97	5.23	91.8	2.36	166	308	4.89	5.04	3.37	1.33	1.96	19	15	4.5	355	12.66
589971	92	CAG	female	67	11.8	3.52	930	1.01	6.74	4.24	94.3	2.77	125	223	3.49	6.23	3.15	1.74	2.02	23	21	4.17	261	4.89
1398029	93	CAG	female	72	12	2.86	440	0.96	5.21	4.67	85.4	1.8	137	185	2.88	5.86	3.23	2.37	0.87	14	20	3.7	204	5.34
1538514	94	CAG	female	53	11.9	2.63	110	1.05	6.69	4.53	92.7	2.18	144	276	4.03	5.43	3.16	1.66	1.71	24	18	4.18	333	5.47
1039048	95	CAG	male	53	11.2	2.53	430	0.98	6.66	4.89	94.5	2.67	153	224	3.06	5.44	3.21	1.26	3.4	24	22	4.73	403	4.56
1536948	96	CAG	female	57	11.9	3.25	550	1.05	3.83	4.39	90	1.43	138	203	2.04	6.47	4.11	1.54	1.7	11	15	4.26	327	5.37
1366675	97	CAG	male	57	10.8	2.32	460	1.02	4.23	5.61	87.5	1.49	162	217	2.26	5.58	0.96	1.02	9.99	18	18	3.84	298	5.11
1086242	98	CAG	male	52	11.3	2.54	170	1.15	5.95	5.23	90.1	2.12	160	214	3.19	7.13	4.08	1.24	2.75	31	20	4.38	363	5.53
716938	99	CAG	female	68	11.3	2.36	270	1.05	6.59	4.23	87.9	1.4	129	193	4.74	4.16	1.95	1.35	1.34	11	13	4.25	263	9.67
1456994	100	CAG	male	49	11	2.85	830	0.94	4.74	5.14	86.8	1.43	154	191	2.92	3.98	1.01	0.56	12.38	12	19	4.14	366	6.34
1595115	101	CAG	male	44	10.8	3.1	180	1.01	4.51	5.08	88.8	1.81	156	237	2.1	3.7	1.95	1.14	1	29	27	4.68	447	4.57
1546399	102	CAG	male	49	11.4	2.04	100	1.08	5.2	4.84	88.2	2.47	153	177	2.12	4.35	2.63	1.48	0.72	20	13	4.27	328	5.32
1160838	103	CAG	female	50	10.8	2.28	120	1.09	6.75	4.37	91.1	1.81	137	146	4.45	5.14	3.12	1.99	0.77	10	15	3.87	257	5.54
1260042	104	CAG	female	62	13.5	1.83	100	1.35	3.46	4.08	94.9	1.41	130	177	1.68	3.93	2.22	1.25	0.8	8.2	6.5	3.57	480.4	4.42
687305	105	CAG	female	71	12.6	3.06	680	1.13	4.68	3.86	91.5	1.88	115	208	2.41	5	2.87	1.48	1.09	10	14	3.96	222	4.85
1266030	106	CAG	female	55	9.5	3.31	110	0.92	5.49	4.23	84.4	2.18	126	211	2.73	5.51	3.27	1.19	1.04	15.8	16	3.66	216.3	4.36
1800555	107	CAG	female	69	11.6	2.89	130	1.09	4.82	4.1	99.3	1.06	131	196	3.28	5.62	3.3	1.78	0.48	16	19	3.82	178	4.03
552697	108	CAG	male	63	12.2	3.02	280	1.09	5.91	4.97	89.1	1.35	152	185	3.76	6.25	3.4	1.45	1.25	19	20	3.75	378	4.77
688965	109	CAG	female	66	12.1	2.59	720	1.11	6.55	4.47	93.3	2.53	133	193	3.17	4.85	2.45	1.74	1.36	23	30	4.17	302	4.64
487860	110	CAG	female	70	10.3	2.24	390	1.1	3.68	4.32	94.2	1.35	135	163	1.88	6.59	4.14	1.88	0.65	16	18	3.95	256	4.63
692986	111	CAG	female	60	11.4	3.39	620	1	6.01	4.78	92.3	2.63	143	250	2.76	6.62	3.75	1.89	1.79	19	21	4.49	182	4.93
731085	112	CAG	female	70	10.4	1.99	960	1.04	2.84	3.6	99.2	1.08	121	162	1.34	5.44	3.5	1.41	1.73	8	15	3.9	244	4.21
628846	113	CAG	male	63	8.3	2.73	50	1.12	7.55	4.95	94.9	3.14	157	292	3.46	6.03	3.72	1.88	0.65	19	19	4.59	396	4.52
1439500	114	CAG	male	58	11.6	2.59	130	1.09	6.68	4.85	92.2	1.97	153	183	4.07	5.3	2.53	1.19	3.12	13	18	4.43	413	4.83
1494632	115	CAG	male	53	12.6	3.64	450	1.08	4.91	5.5	84	2.11	157	273	2.4	4.72	2.82	1.26	1.27	22	21	4.3	506	5.62
689793	116	CAG	male	63	11	2.06	200	1.14	6.7	4.88	91	2.26	153	308	3.93	4.19	2.34	1.75	1.03	19	17	4.4	267	5.79
1205671	117	CAG	female	51	13.1	2.98	480	1.04	5.94	4.31	92.6	1.41	134	236	4.08	4.67	2.14	2.1	0.6	14	14	4.02	261	4.82
1355841	118	CAG	female	55	12.6	2.41	300	0.96	3.76	4.88	91	1.65	144	170	1.8	5.26	3.47	1.96	0.79	11	15	4.06	275	5.05
1439106	119	CAG	female	67	11.5	3.02	330	1.07	5.87	5.07	83	1.69	140	250	3.8	5.31	2.72	1.84	2.72	13	23	4.5	219	5.92
1682604	120	CAG	female	68	12.8	2.73	380	0.98	3.16	2.46	119.5	2.02	107	88	0.96	4.08	1.73	0.87	1.82	14	23	4.42	247	5.67
1455190	121	CAG	male	58	11.3	2.59	170	1.03	5.53	4.38	89.7	1.88	132	209	2.99	4.33	2.66	1.47	0.71	13	16	4	373	6.64
1274692	122	CAG	female	59	11.7	3.87	360	1.11	5.67	4.57	89.3	2.87	140	258	2.4	5.94	3.36	2.02	0.96	21	22	4.2	219	5.11
1428200	123	CAG	male	73	11.5	2.29	170	1.1	3.2	4.22	94.5	1.15	135	171	1.59	4.7	2.79	1.57	1.02	17	17	3.62	348	4.91
794529	124	CAG	female	67	12.2	3.04	620	1.09	5.34	3.8	96.8	2.01	117	209	2.85	7.09	4.37	1.62	1.2	14	19	3.97	239	4.73
1401063	125	CAG	male	53	12.3	3.41	400	0.96	5.64	4.47	89	1.66	141	287	3.49	4.65	2.82	1.28	1.66	24	15	3.88	417	5.28
1317867	126	CAG	male	60	12	2.06	180	1.24	4.54	4.17	95.9	2.33	138	125	1.6	4.51	2.58	1.35	0.93	18	22	3.82	308	4.54
1648333	127	CAG	female	60	12.1	1.79	290	1.15	3.6	3.92	98.7	0.89	132	198	2.43	4.6	2.31	1.92	0.73	14	17	3.91	283	5.9
1217003	128	CAG	male	66	12.9	2.51	390	1.06	2.54	4.84	85.1	0.9	141	187	1.36	5.93	3.35	1.44	0.69	36	27	4.12	392	4.32
1280001	129	CAG	female	55	10.7	2.7	330	1.11	4.81	4.73	89.2	1.77	142	154	2.7	6.78	4.57	1.89	0.84	30	24	4.46	229	5.6
1143136	130	CAG	female	79	12.8	3.7	240	0.95	4.87	3.61	88.9	1.78	103	449	2.68	4.29	2.19	1.42	0.98	4	11	4.25	175	4.77
603864	131	CAG	female	73	10.5	4.7	480	0.98	10.08	5.18	87.1	3.36	150	346	5.75	4.88	2.55	1.59	1.18	10	21	3.58	376	5.31
1486372	132	CAG	male	50	10.9	2.98	260	1.03	4.2	4.87	88.3	1.68	148	166	2.21	2.24	0.87	1.15	0.61	21	21	4.23	404	6.06
1515916	133	CAG	female	56	14.2	1.01	380	1.65	3.42	4.58	91	2.21	140	248	0.93	8.44	5.43	2.18	0.81	13	16	4.08	319	4.68
1261049	134	CAG	male	74	10.1	2.28	150	1.06	3.74	3.78	98.4	1.9	118	139	1.53	6.39	3.86	1.87	0.81	11	17	3.98	183	5.25
1318762	135	CAG	female	49	11.5	2.85	270	1.04	3.73	4.5	89.1	1.56	131	262	1.86	4.43	2.29	1.69	1.23	36	28	4.09	349	4.98
1362088	136	CAG	male	52	11.7	3.93	440	1	3.42	4.25	98.8	1.87	147	97	1.02	3.17	1.9	1.02	1.25	28	20	4.14	415	5.19
1045248	137	CAG	male	54	11	3.89	240	1.04	6.84	5.48	88	1.49	158	289	4.71	7.49	4.31	2.25	1.34	18	38	3.89	384	5.61
1217563	138	CAG	male	52	11	2.94	80	1.04	4.32	4.55	88.1	2.14	138	239	1.91	5.62	4.04	1.23	3.48	18	16	4.65	375	4.86
1245724	139	CAG	female	62	10.5	2.77	280	1.08	6.32	4.71	88.1	2.37	141	323	3.4	6.3	4.14	1.61	0.74	15	18	4.1	322	6.02
1313924	140	CAG	male	50	11.3	2.26	450	1.14	4.66	5.02	89	1.85	151	176	2.46	4.21	2.59	1.39	0.85	13	14	4.08	422	5.31
1361206	141	CAG	female	59	13.1	3.61	250	0.93	3.92	3.91	91.6	1.35	120	199	1.99	3.35	1.94	1.13	0.72	28	21	4.53	270	4.69
742176	142	CAG	male	53	11.3	2.5	110	1.09	7.1	4.62	93.1	2.27	147	217	3.61	6.08	3.82	1.54	2.31	33	36	4.08	422	5.6
794953	143	CAG	female	51	11.7	2.68	170	1.06	6.01	4.44	94.4	1.64	138	239	3.85	4.4	2.16	1.29	3.1	24	19	4.07	308	4.84
1260634	144	CAG	male	52	11.7	3.01	350	1.12	4.78	5.31	88.5	1.81	161	277	2.65	5.57	3.18	1.49	1.62	22	22	4.13	436	5.67
1277427	145	CAG	male	55	12.2	2.72	380	1.05	4.97	4.96	85.9	1.68	149	239	2.93	6.07	3.76	1.93	1.27	21	22	4.24	303	5.68
1280486	146	CAG	female	53	10.9	2.6	1220	1.27	3.89	4	92.3	0.9	125	114	2.56	5.08	3.24	0.84	1.23	29	22	3.09	248	5.85
1281843	147	CAG	female	58	10	2.04	480	1.08	3.86	4.79	90.6	1.43	145	245	2.05	6.52	3.49	2.34	0.48	15	24	4.93	217	5.34
1253344	148	CAG	female	61	11.5	4.22	440	1.09	5.47	4.55	91	1.64	139	258	3.31	4.93	3.1	1.56	0.53	16	18	3.83	210	4.15
1199803	149	CAG	male	65	11.3	3.1	280	1.02	4.16	4.26	89.9	0.88	125	146	2.68	3.78	1.7	1.5	0.65	23	21	4.26	241	4.87
1578539	150	CAG	male	38	11.2	3.46	380	0.99	5.01	5.32	81.1	1.86	142	243	2.76	5.32	3.62	1.16	1.27	8	11	3.72	247	4.37
1236517	151	GC	male	57	10.9	5.18	1880.0	1.04	7.53	3.13	92.3	1.26	95.0	198.0	5.49	7.31	4.96	1.7	2.12	20.0	19.0	3.85	309.0	4.6
1236735	152	GC	male	53	12.5	4.26	2250.0	1.11	3.39	4.5	85.6	0.85	130.0	240.0	2.24	4.98	2.62	1.0	1.6	10.1	5.9	3.82	263.4	9.39
1237098	153	GC	male	60	9.7	2.85	270.0	1.18	3.42	3.94	76.9	1.13	93.0	217.0	1.75	4.67	2.94	1.11	2.88	26.0	19.0	3.75	367.0	4.57
1238427	154	GC	female	69	10.4	2.71	170.0	1.08	4.76	5.31	84.2	1.43	150.0	154.0	2.98	4.27	2.46	1.25	1.52	14.0	11.0	4.28	278.0	5.17
1239364	155	GC	male	56	10.7	4.32	600.0	1.22	11.78	3.99	79.7	1.83	101.0	491.0	8.61	3.66	2.34	0.77	1.16	10.0	6.0	4.97	284.0	8.83
1240311	156	GC	female	66	12.0	1.93	100.0	1.32	4.44	5.02	86.9	2.01	149.0	238.0	2.03	4.0	2.6	0.78	1.42	12.2	16.8	3.8	382.9	8.43
1240725	157	GC	male	67	8.9	3.43	370.0	1.08	6.13	4.67	87.6	1.82	128.0	286.0	3.74	5.82	3.51	1.92	1.7	13.0	11.0	4.31	227.0	5.77
1240726	158	GC	male	78	14.2	2.74	1190.0	1.08	6.35	4.33	95.2	3.4	138.0	388.0	2.3	5.33	3.36	0.95	1.63	16.63	13.71	4.41	283.6	5.83
1241020	159	GC	female	65	12.5	4.9	1150.0	1.07	10.05	4.67	91.0	1.1	133.0	383.0	7.98	4.69	2.68	1.42	1.1	14.5	10.0	4.21	496.0	5.09
1241116	160	GC	male	74	11.9	4.56	490.0	1.1	8.42	3.42	86.9	0.63	95.0	369.0	7.13	4.64	3.13	0.97	1.14	63.0	55.0	4.1	133.0	9.3
1241181	161	GC	male	81	10.7	4.68	430.0	1.05	6.54	4.64	88.8	2.1	136.0	317.0	3.79	5.38	3.63	1.27	1.09	12.0	12.0	4.54	274.0	5.34
1241398	162	GC	male	70	8.2	3.64	1740.0	1.07	5.38	2.8	98.2	1.29	88.0	262.0	3.59	4.8	2.9	1.48	1.13	14.0	5.0	3.66	301.0	5.08
1241450	163	GC	male	66	10.0	3.8	320.0	1.03	10.4	3.91	92.1	2.0	119.0	182.0	7.44	2.96	1.54	1.02	0.85	16.5	24.8	5.06	281.9	7.05
1241583	164	GC	male	58	9.8	4.11	340.0	1.05	2.81	3.92	90.1	1.16	114.0	260.0	1.16	5.85	3.23	2.04	0.94	17.0	13.0	4.18	298.0	4.4
1241736	165	GC	male	77	11.2	4.42	100.0	1.14	6.18	4.13	82.1	2.54	112.0	237.0	3.15	4.93	2.99	0.97	1.4	13.5	8.5	3.66	220.0	5.61
1241775	166	GC	male	64	10.3	3.74	330.0	1.03	7.99	5.45	65.7	2.01	102.0	448.0	5.41	5.55	3.44	1.36	0.71	17.0	18.0	4.05	247.0	4.69
1241963	167	GC	female	55	9.2	4.26	790.0	1.1	4.95	3.93	75.6	1.62	82.0	358.0	2.91	4.88	3.39	1.03	2.28	13.0	9.0	4.35	255.0	6.99
1242114	168	GC	male	86	12.3	2.2	360.0	1.27	3.91	4.0	79.3	1.49	91.0	246.0	2.11	3.49	1.84	0.9	0.92	10.8	6.9	4.26	240.9	4.6
1242397	169	GC	male	63	13.0	4.08	1000.0	0.99	4.38	1.81	111.0	0.78	63.0	132.0	3.21	3.63	1.88	1.26	2.73	13.17	24.58	3.92	132.51	5.49
1242556	170	GC	male	53	10.1	4.01	490.0	1.03	5.66	4.7	90.6	2.24	146.0	291.0	2.24	4.51	3.1	1.21	1.01	24.0	18.0	4.79	302.0	4.2
1242558	171	GC	female	63	11.1	2.11	280.0	0.98	3.27	3.94	90.9	1.14	118.0	301.0	1.73	5.36	2.42	1.9	0.73	20.0	17.0	4.15	220.0	4.46
1242582	172	GC	female	52	12.7	5.07	390.0	0.93	8.11	3.45	90.8	1.07	106.0	429.0	6.05	5.8	4.29	0.46	2.28	241.0	329.0	4.4	103.0	4.49
1242780	173	GC	male	73	9.2	4.4	270.0	1.17	12.8	3.54	91.2	0.51	110.0	320.0	11.78	3.35	2.21	0.97	0.45	14.9	6.7	3.77	236.0	4.68
1242788	174	GC	male	73	10.2	4.32	1420.0	0.89	5.43	4.72	89.4	1.26	133.0	209.0	3.59	5.08	3.08	1.2	0.85	29.5	37.4	4.4	322.1	5.18
1242851	175	GC	male	66	13.3	4.58	200.0	1.09	4.97	4.75	89.1	0.73	144.0	198.0	3.55	4.19	2.59	0.82	0.62	21.0	15.8	4.04	313.1	5.27
1242887	176	GC	male	54	10.1	4.27	440.0	1.1	6.15	3.06	70.2	1.78	60.0	509.0	3.65	3.79	2.62	1.24	0.55	11.0	7.0	4.07	300.0	5.11
1243030	177	GC	female	71	9.3	2.21	60.0	1.2	5.32	5.1	90.4	2.02	148.0	255.0	2.75	4.64	2.6	1.21	0.84	21.7	34.9	4.08	291.3	15.82
1243435	178	GC	male	92	10.7	3.58	200.0	0.99	5.26	5.19	73.1	1.03	116.0	237.0	3.73	5.69	4.15	1.24	1.17	11.0	10.0	4.28	261.0	3.73
1243480	179	GC	male	70	10.6	2.66	120.0	1.15	3.58	4.06	95.1	1.12	120.0	120.0	2.07	4.62	2.55	1.55	0.88	25.3	20.5	4.19	307.9	5.21
1243784	180	GC	female	66	10.5	3.04	240.0	0.89	4.95	4.18	102.2	1.14	143.0	184.0	3.34	3.85	2.1	1.27	1.13	16.8	11.7	4.15	257.4	5.2
1243828	181	GC	male	61	10.0	4.21	640.0	1.04	8.25	2.98	86.4	1.59	84.0	532.0	5.93	3.74	2.62	0.88	1.1	16.0	11.0	4.73	400.0	4.34
1243865	182	GC	male	70	11.8	2.52	100.0	1.15	3.94	4.43	87.1	1.61	134.0	150.0	2.0	5.34	3.06	1.51	1.06	14.7	17.6	3.9	239.7	5.16
1243878	183	GC	male	60	10.3	3.83	220.0	1.0	6.96	5.46	80.9	2.13	149.0	225.0	4.11	3.34	2.13	0.75	1.83	22.0	18.0	4.43	415.0	4.53
1244044	184	GC	male	57	10.5	2.55	210.0	1.13	4.07	4.88	92.0	1.92	150.0	185.0	1.68	4.02	2.53	1.37	0.69	22.0	22.0	4.08	228.0	4.38
1244050	185	GC	male	65	9.5	3.16	220.0	1.26	4.51	4.12	94.2	1.41	125.0	232.0	2.6	5.56	3.62	1.62	0.78	16.0	9.0	3.67	187.0	4.48
1244294	186	GC	male	63	11.8	3.87	510.0	1.04	12.37	4.46	101.3	0.81	149.0	205.0	11.01	5.62	2.52	2.75	0.37	44.0	19.0	3.7	128.0	5.7
1244510	187	GC	male	47	12.4	3.19	750.0	0.94	3.16	4.5	84.4	1.12	121.0	186.0	1.5	4.32	2.5	1.2	1.26	15.11	8.3	4.15	351.63	4.93
1244573	188	GC	female	69	9.5	3.34	300.0	1.09	3.22	3.74	83.1	1.1	101.0	192.0	1.73	5.18	3.59	1.25	1.19	12.0	5.0	3.7	260.0	4.7
1245004	189	GC	male	64	12.1	2.26	930.0	1.06	4.86	4.93	81.7	1.74	134.0	248.0	2.63	5.04	3.15	1.32	0.62	17.87	18.54	4.42	279.27	5.1
1245425	190	GC	female	68	12.6	2.67	80.0	1.23	5.02	3.63	68.0	1.75	68.0	228.0	2.6	3.18	1.88	0.95	0.67	13.0	8.7	4.19	227.4	4.86
1245511	191	GC	female	58	12.0	2.15	900.0	1.11	3.4	2.87	94.1	1.25	90.0	88.0	1.85	4.35	1.27	2.48	0.44	23.0	17.0	3.71	237.0	4.97
1245562	192	GC	male	52	10.9	3.13	60.0	1.21	5.76	4.74	77.6	2.01	117.0	135.0	3.33	5.16	3.4	1.49	0.67	15.0	18.4	4.48	196.4	5.03
1245586	193	GC	male	70	9.9	3.82	220.0	1.05	7.52	4.97	96.0	2.09	160.0	134.0	4.98	4.29	2.64	1.03	0.77	18.0	10.0	4.02	193.0	4.19
1245764	194	GC	male	62	9.6	3.29	560.0	1.08	5.1	5.17	88.8	1.11	150.0	229.0	3.37	4.59	2.83	1.24	0.68	17.0	12.0	4.22	419.0	4.24
1245827	195	GC	male	57	11.4	2.84	290.0	1.28	3.52	4.6	86.4	1.07	132.0	164.0	1.98	3.33	2.09	1.0	1.23	28.0	33.0	4.5	245.0	7.7
1245914	196	GC	male	77	10.2	3.54	750.0	1.13	4.38	4.69	100.8	1.36	161.0	249.0	2.69	5.05	3.15	1.32	0.8	27.0	10.0	5.66	262.0	4.77
1245998	197	GC	male	59	10.6	3.29	420.0	1.21	3.23	3.78	87.1	0.57	110.0	101.0	2.15	2.91	1.45	0.26	3.24	60.0	37.0	4.79	142.0	4.29
1246020	198	GC	female	57	9.4	4.37	210.0	1.03	8.99	4.25	84.6	2.29	114.0	374.0	5.71	2.67	4.39	1.31	1.19	10.0	6.0	4.53	183.0	12.0
1246089	199	GC	male	59	9.4	4.5	430.0	1.02	9.61	3.36	85.3	2.34	88.0	321.0	6.47	2.93	1.63	1.06	1.4	16.0	16.0	4.21	227.0	5.39
1246967	200	GC	male	53	10.0	3.16	290.0	1.08	6.2	5.11	81.8	2.32	140.0	258.0	3.31	2.54	1.32	0.81	1.18	15.0	16.0	3.59	404.0	5.78
1247083	201	GC	female	81	12.2	3.35	920.0	0.87	6.61	3.83	78.3	0.76	98.0	118.0	4.94	4.16	2.51	0.89	1.57	9.0	6.6	3.54	204.5	6.06
1247095	202	GC	female	55	10.6	3.72	380.0	1.11	5.9	4.32	77.8	1.56	106.0	285.0	2.86	4.07	2.94	0.62	1.56	28.8	26.4	4.71	379.5	4.09
1247338	203	GC	female	67	9.4	3.62	210.0	0.98	5.95	4.68	91.7	1.34	142.0	160.0	4.27	6.18	3.84	1.86	1.04	19.0	18.0	4.29	288.0	4.63
1247380	204	GC	male	49	9.5	2.75	190.0	1.04	3.94	5.54	86.2	2.13	164.0	179.0	1.28	6.36	4.34	1.4	3.09	21.0	19.0	4.48	277.0	4.29
1247419	205	GC	female	53	9.2	3.07	180.0	0.97	6.5	4.29	98.1	2.64	141.0	205.0	3.12	4.55	2.7	1.28	1.06	15.0	12.0	4.46	280.0	4.47
1247442	206	GC	male	54	8.6	2.44	280.0	1.04	4.2	4.33	88.4	1.33	124.0	212.0	2.47	7.43	5.21	1.57	1.28	14.0	15.0	4.33	242.0	5.64
1247495	207	GC	male	73	9.9	3.58	240.0	0.95	7.98	3.23	93.2	2.07	98.0	335.0	5.09	4.2	2.79	1.02	2.67	19.0	27.0	4.61	241.0	4.9
1247506	208	GC	male	56	9.8	3.04	130.0	1.11	6.99	4.05	95.8	2.74	126.0	193.0	3.28	5.07	2.95	1.33	1.07	21.4	9.0	3.82	344.0	3.43
1247553	209	GC	male	57	10.0	2.79	280.0	1.15	5.07	4.44	92.0	1.89	137.0	208.0	2.52	5.31	3.62	1.34	1.93	30.0	46.0	4.43	169.0	4.78
1247691	210	GC	female	72	10.4	3.39	210.0	1.0	8.33	4.79	90.4	1.69	140.0	161.0	5.7	4.5	2.32	1.32	0.61	16.0	14.0	4.07	335.0	5.24
1247850	211	GC	male	68	11.2	3.44	180.0	0.97	3.99	3.31	88.2	2.15	95.0	278.0	1.55	3.43	1.59	1.11	0.74	14.7	7.6	4.02	205.2	3.76
1247870	212	GC	female	54	11.9	2.7	320.0	1.17	6.09	4.28	89.5	2.16	128.0	314.0	3.07	3.72	2.3	0.98	0.88	16.8	17.5	4.32	241.6	3.77
1247892	213	GC	male	56	13.0	5.35	190.0	1.05	6.36	4.29	88.6	0.55	125.0	305.0	5.21	3.49	2.2	1.05	0.82	13.5	11.9	4.27	337.3	3.1
1247909	214	GC	male	80	13.5	2.67	1270.0	1.23	4.93	2.7	81.9	0.77	65.0	506.0	3.79	3.94	2.49	1.05	0.93	10.6	17.2	4.94	242.3	7.54
1247918	215	GC	male	74	9.9	2.76	280.0	1.14	7.05	4.79	87.8	1.93	143.0	206.0	4.47	4.1	2.34	1.08	0.81	17.0	15.0	4.24	290.0	4.35
1247952	216	GC	female	71	9.6	2.49	240.0	1.15	4.13	4.76	90.5	1.93	139.0	244.0	1.67	5.07	3.07	1.66	0.9	20.0	13.0	4.01	199.0	4.33
1248009	217	GC	male	71	9.9	4.17	620.0	1.09	7.16	3.62	92.8	1.87	111.0	166.0	4.55	4.7	2.53	0.85	1.59	16.0	12.0	4.58	319.0	4.6
1248072	218	GC	male	67	9.5	2.68	340.0	1.22	5.71	5.05	88.8	1.89	152.0	163.0	3.14	5.0	3.58	1.2	1.02	19.0	12.0	4.4	380.0	4.64
1248119	219	GC	male	66	9.9	3.13	780.0	1.13	5.02	4.1	93.4	1.07	132.0	184.0	3.4	4.27	2.24	1.82	0.37	22.0	15.0	4.34	201.0	3.2
1248123	220	GC	male	64	12.9	4.28	360.0	0.98	5.42	4.27	88.5	1.45	122.0	236.0	3.5	6.85	5.15	1.58	1.15	12.0	8.0	3.91	287.0	4.48
1248142	221	GC	female	93	10.1	2.73	2140.0	1.07	5.47	3.56	79.8	0.92	92.0	261.0	3.56	3.26	2.18	0.68	1.35	12.4	4.0	4.15	68.9	5.8
1248204	222	GC	male	63	11.9	2.43	500.0	1.29	5.01	2.73	91.6	1.01	82.0	240.0	2.75	2.71	1.37	1.0	0.52	18.2	7.7	4.06	261.8	4.73
1248507	223	GC	male	75	9.5	3.6	430.0	0.99	6.61	5.38	96.8	2.35	173.0	221.0	3.24	6.47	3.36	2.35	1.58	40.0	18.0	3.99	373.0	4.08
1248521	224	GC	male	70	9.6	4.01	280.0	0.98	10.26	5.45	91.7	3.48	167.0	361.0	5.79	7.62	5.54	1.39	1.68	23.0	23.0	5.38	263.0	4.93
1248758	225	GC	female	85	9.7	2.56	4850.0	1.06	5.92	3.08	92.9	1.15	92.0	200.0	4.27	4.23	2.31	0.97	0.86	25.0	20.0	3.83	201.0	6.08
1249475	226	GC	male	73	12.3	4.21	40.0	0.87	8.59	4.85	89.5	3.04	146.0	298.0	4.76	4.09	2.14	1.48	0.76	15.6	7.1	4.22	306.4	4.07
1249602	227	GC	male	83	12.7	4.73	8880.0	1.05	18.37	5.48	75.4	1.62	133.0	411.0	15.58	5.93	3.59	0.74	1.56	19.0	17.0	4.9	413.0	6.4
1249632	228	GC	female	68	12.8	3.75	590.0	1.03	7.31	3.92	87.8	3.1	111.0	186.0	2.71	4.68	2.7	1.38	1.15	23.95	20.99	4.19	262.84	7.25
1250325	229	GC	male	75	9.6	4.79	410.0	1.0	6.48	3.94	97.0	1.55	125.0	234.0	4.47	5.49	3.57	1.55	1.03	13.0	10.0	4.05	320.0	5.43
1250515	230	GC	male	62	12.1	2.57	750.0	1.15	4.94	3.87	80.4	0.82	99.0	177.0	3.59	4.45	2.82	1.28	0.93	22.0	6.0	4.38	322.0	5.88
1250750	231	GC	male	81	11.3	6.21	4070.0	1.06	12.38	4.02	69.4	0.54	79.0	422.0	10.91	2.23	0.82	1.06	0.52	8.0	7.0	4.59	256.0	6.88
1250810	232	GC	male	64	11.1	5.45	120.0	0.73	8.26	4.2	101.7	2.28	145.0	313.0	4.9	5.69	3.05	1.88	0.71	38.3	36.5	4.52	251.5	5.02
1250881	233	GC	female	57	13.3	4.16	400.0	1.03	8.57	4.63	86.5	1.29	127.0	251.0	6.62	3.98	2.19	1.02	0.63	15.0	11.0	4.81	172.0	5.75
1251151	234	GC	female	57	9.9	2.84	570.0	1.21	4.21	3.82	74.1	2.02	83.0	249.0	1.77	5.6	2.87	1.17	1.79	14.0	8.0	4.16	335.0	4.34
1251385	235	GC	male	62	12.7	2.42	100.0	1.26	11.02	4.23	84.9	0.85	122.0	218.0	9.28	4.84	2.52	1.72	0.56	12.2	8.3	4.2	185.9	4.67
1251572	236	GC	male	72	9.6	3.66	360.0	1.05	9.0	4.54	96.7	3.77	147.0	231.0	4.64	5.1	3.2	1.39	1.34	19.0	12.0	4.61	395.0	4.92
1251766	237	GC	male	68	9.7	4.79	590.0	1.0	8.1	4.14	96.9	1.84	133.0	316.0	5.48	4.54	2.59	1.08	1.22	15.0	10.0	3.67	299.0	4.76
1251978	238	GC	female	69	8.9	2.86	350.0	1.04	6.94	5.13	91.5	3.07	162.0	158.0	3.06	6.1	4.05	1.27	1.0	16.0	16.0	4.05	322.0	4.57
1252262	239	GC	male	72	10.7	3.72	60.0	0.85	6.38	5.51	83.7	1.01	165.0	244.0	4.58	5.38	3.47	1.26	0.89	13.5	11.1	4.07	146.2	6.55
1252297	240	GC	male	72	8.7	4.79	340.0	1.04	4.53	2.86	90.6	1.14	82.0	293.0	2.61	4.59	2.78	0.94	1.53	16.0	11.0	4.53	168.0	4.31
1252435	241	GC	male	63	10.3	4.75	340.0	0.97	8.71	4.69	83.5	1.26	128.0	371.0	6.76	3.29	2.08	0.7	1.16	17.0	11.0	3.88	186.0	5.39
1252574	242	GC	male	76	11.5	3.63	550.0	1.0	4.18	4.04	84.4	1.57	113.0	255.0	2.16	4.52	2.76	1.34	0.9	15.0	8.0	3.91	227.0	4.74
1252601	243	GC	male	81	11.2	3.21	500.0	1.04	4.86	2.74	79.9	0.92	65.0	321.0	3.17	2.86	1.74	0.94	0.74	9.9	7.1	3.77	190.5	4.68
1252666	244	GC	male	76	9.8	3.59	220.0	0.85	3.98	3.62	102.2	1.98	129.0	154.0	1.45	4.57	2.31	1.61	1.63	36.5	9.9	3.48	268.0	5.78
1252950	245	GC	male	72	10.0	2.35	370.0	1.24	8.61	3.4	83.6	1.66	94.0	227.0	5.98	4.08	2.33	0.91	1.19	19.0	13.0	3.1	230.0	7.0
1252974	246	GC	female	66	11.3	3.23	230.0	1.11	5.55	3.84	93.0	1.37	121.0	233.0	3.67	3.43	2.04	1.13	0.7	15.0	9.0	4.28	254.0	3.69
1253223	247	GC	female	76	11.1	3.22	310.0	1.39	4.87	2.86	80.8	2.37	68.0	452.0	1.74	3.74	2.29	1.01	0.95	14.0	13.0	4.53	341.0	4.42
1253252	248	GC	male	62	14.5	1.96	15190.0	1.12	6.38	4.33	91.5	1.42	134.0	112.0	4.56	11.72	8.28	0.98	2.64	29.63	9.17	4.68	244.73	5.78
1253431	249	GC	male	69	10.0	5.77	600.0	0.91	4.75	4.62	80.3	1.68	117.0	475.0	2.61	4.79	2.65	1.44	0.92	19.0	13.0	4.47	229.0	4.4
1253510	250	GC	male	58	8.8	2.92	110.0	1.0	6.02	4.12	93.4	2.61	127.0	274.0	2.96	6.26	3.99	1.44	1.48	13.9	11.3	3.57	283.5	5.54
1253613	251	GC	female	52	9.6	4.46	440.0	1.02	11.19	3.31	81.2	2.24	80.0	485.0	8.23	6.71	4.72	1.41	1.47	16.0	12.0	3.82	223.0	5.0
1253859	252	GC	female	72	11.4	2.24	340.0	0.97	5.2	4.78	95.0	2.39	139.0	183.0	2.19	3.66	1.87	1.42	0.58	10.3	5.5	4.45	223.7	4.29
1254192	253	GC	female	75	9.8	3.57	220.0	1.05	5.5	4.16	91.1	1.8	124.0	263.0	3.36	6.03	3.96	1.8	0.78	17.0	9.0	4.56	251.0	4.66
1254511	254	GC	male	68	9.4	3.77	1870.0	0.98	4.98	4.27	86.2	1.02	117.0	217.0	3.39	7.15	5.28	1.32	2.48	11.0	6.0	4.24	202.0	4.32
1254575	255	GC	male	85	16.4	3.37	2570.0	1.07	10.71	4.17	67.9	0.28	96.0	99.0	10.28	2.06	1.29	0.49	0.6	44.2	42.5	3.36	169.0	6.49
1254608	256	GC	male	58	9.6	2.69	420.0	1.14	4.63	4.83	85.2	1.4	141.0	250.0	2.72	5.09	3.69	1.02	1.22	16.0	14.0	3.54	359.0	6.84
1254683	257	GC	female	86	9.2	2.92	370.0	1.0	6.23	5.44	82.7	3.11	154.0	259.0	2.62	7.98	4.87	1.86	1.11	27.0	19.0	3.59	577.0	4.04
1254782	258	GC	male	80	10.0	3.11	120.0	0.93	7.54	4.26	87.8	1.95	129.0	203.0	4.83	3.65	2.24	1.21	1.13	10.9	11.6	4.1	253.3	4.78
1254933	259	GC	male	76	10.2	3.05	270.0	1.11	6.18	4.9	80.5	1.06	127.0	300.0	4.6	5.36	2.92	1.91	0.76	20.0	10.0	4.01	189.0	5.35
1254968	260	GC	female	59	10.7	3.08	230.0	1.04	6.24	4.61	93.4	2.47	142.0	242.0	3.18	5.61	3.7	1.14	0.92	17.0	20.0	4.02	294.0	4.74
1255028	261	GC	male	62	10.1	3.59	310.0	1.1	14.16	2.8	76.4	2.61	65.0	481.0	10.33	3.78	2.53	0.98	1.32	13.0	8.0	3.85	223.0	4.49
1255122	262	GC	male	68	11.7	4.52	950.0	1.02	9.08	4.0	95.5	1.59	130.0	229.0	6.63	6.3	4.4	1.59	0.89	31.0	23.0	4.14	180.0	4.26
1255211	263	GC	female	79	9.4	4.62	230.0	1.02	5.87	4.41	90.9	1.6	131.0	328.0	3.49	4.04	2.64	1.11	0.79	17.0	15.0	4.65	290.0	4.19
1255220	264	GC	male	75	11.0	2.81	240.0	1.04	5.34	4.57	95.7	1.7	147.0	219.0	3.22	5.48	3.49	1.4	0.72	21.0	15.0	4.45	324.0	4.79
1255319	265	GC	female	64	13.2	3.15	810.0	1.21	10.87	1.7	75.9	0.92	36.0	296.0	9.25	2.36	1.19	0.83	0.51	17.3	9.9	8.36	208.0	5.81
1255401	266	GC	male	88	10.0	3.45	190.0	1.13	5.97	4.44	75.2	1.45	99.0	312.0	4.08	5.75	3.69	1.74	0.93	16.0	5.0	4.96	85.0	4.75
1255500	267	GC	male	62	10.5	3.43	160.0	0.86	6.93	3.1	89.0	2.25	94.0	227.0	3.91	3.83	2.31	0.84	1.31	12.1	8.6	3.66	207.5	5.45
1256176	268	GC	male	69	9.1	3.51	350.0	1.04	5.02	3.68	93.8	1.52	112.0	497.0	3.24	4.72	2.92	1.47	0.81	14.0	10.0	4.15	232.0	4.65
1256291	269	GC	female	59	10.7	2.65	80.0	1.01	3.33	4.31	63.6	1.41	70.0	307.0	1.5	4.43	2.88	1.24	1.41	12.9	13.5	4.26	169.7	4.77
1256409	270	GC	female	74	9.5	3.59	230.0	0.95	6.22	4.9	88.5	2.18	150.0	254.0	3.49	5.16	3.36	1.38	1.33	17.0	15.0	4.08	315.0	8.45
1256452	271	GC	female	70	10.4	2.22	230.0	1.13	7.05	5.26	88.0	2.74	155.0	366.0	3.63	5.21	3.62	1.22	1.15	13.0	11.0	4.51	203.0	5.51
1256514	272	GC	male	69	9.1	3.62	550.0	1.02	4.6	4.29	92.5	2.18	144.0	266.0	2.02	6.07	4.01	1.52	0.74	17.0	12.0	5.61	249.0	5.9
1256571	273	GC	male	74	10.4	5.25	5190.0	0.92	7.5	4.59	97.2	0.76	143.0	213.0	6.38	9.51	7.26	2.0	1.76	28.0	19.0	4.33	202.0	4.93
1256780	274	GC	male	56	9.1	2.95	300.0	1.05	7.31	3.98	93.7	2.3	128.0	261.0	4.45	5.64	3.21	1.25	1.06	19.0	12.0	3.99	338.0	4.74
1256979	275	GC	male	67	11.3	3.04	60.0	0.93	9.61	5.18	82.8	1.7	149.0	167.0	7.52	3.64	2.21	0.95	2.17	7.5	9.6	3.95	159.3	25.28
1257119	276	GC	male	57	12.3	2.89	1140.0	1.23	6.06	2.44	91.8	1.44	69.0	193.0	4.36	3.11	2.0	0.67	0.94	9.0	11.4	4.43	372.5	7.89
1257286	277	GC	female	59	9.7	3.64	2330.0	1.21	4.07	2.99	95.0	2.09	94.0	138.0	1.55	3.1	1.45	1.23	0.71	29.0	24.0	3.61	263.0	4.59
1257485	278	GC	female	26	9.3	3.57	290.0	1.09	6.37	3.16	91.3	1.77	92.0	459.0	3.66	4.5	3.35	0.86	1.36	13.0	8.0	4.2	311.0	4.7
1257503	279	GC	female	58	9.0	2.7	230.0	1.1	5.68	4.24	92.2	1.98	130.0	321.0	3.27	5.41	3.27	1.8	0.92	16.0	21.0	4.24	259.0	4.53
1257616	280	GC	male	64	9.1	2.11	230.0	1.24	4.42	3.64	93.4	2.06	116.0	175.0	1.89	3.26	1.69	1.55	0.74	13.0	8.0	3.93	215.0	4.27
1257948	281	GC	male	63	10.1	3.85	310.0	1.0	8.27	4.75	91.8	2.23	150.0	250.0	5.33	5.76	3.54	1.1	1.63	14.0	13.0	3.9	336.0	5.2
1257952	282	GC	male	72	9.9	3.41	260.0	1.01	9.21	4.88	90.8	2.25	140.0	299.0	5.81	8.44	5.9	1.81	1.03	17.0	14.0	4.72	257.0	4.25
1258063	283	GC	female	45	15.7	4.24	12420.0	0.97	7.01	3.92	92.6	0.9	122.0	280.0	5.42	6.72	5.2	0.91	2.67	66.0	250.0	4.68	129.0	5.31
1258152	284	GC	male	71	10.3	2.24	280.0	1.18	4.91	4.63	91.2	1.99	144.0	140.0	2.56	3.97	2.45	1.39	0.61	18.0	15.0	3.9	262.0	4.7
1258646	285	GC	male	53	14.2	4.3	1360.0	1.12	7.22	4.56	74.7	1.59	100.0	246.0	5.08	2.52	1.46	0.73	1.05	28.0	13.0	5.21	188.0	3.94
1259140	286	GC	male	40	10.9	3.25	190.0	1.05	4.43	5.14	91.1	1.29	161.0	183.0	2.82	3.81	2.07	1.19	0.59	15.0	11.0	4.48	295.0	4.55
1259257	287	GC	male	70	10.2	2.53	20.0	1.0	5.06	4.54	82.2	1.77	132.0	176.0	2.85	4.62	2.64	1.5	1.12	13.9	10.2	3.54	146.9	5.04
1259308	288	GC	male	70	9.9	3.01	1840.0	1.18	4.9	2.42	97.1	0.87	79.0	270.0	3.54	3.61	2.23	0.67	1.13	16.0	8.0	3.88	139.0	3.1
1259383	289	GC	male	80	10.5	2.96	1460.0	1.09	5.66	3.94	94.8	1.79	122.0	275.0	3.42	4.12	2.03	1.38	1.09	19.0	15.0	4.62	171.0	4.46
1259442	290	GC	female	63	11.8	4.0	3210.0	1.0	8.43	4.95	89.5	0.73	150.0	320.0	7.31	4.44	2.81	1.19	1.55	18.0	19.0	4.8	227.0	8.26
1260199	291	GC	male	56	10.2	2.34	140.0	1.09	5.34	4.88	91.4	1.86	150.0	237.0	3.01	5.71	3.3	1.67	0.93	24.0	22.0	4.21	215.0	4.62
1260324	292	GC	male	47	10.5	4.24	200.0	0.99	7.0	4.43	87.8	2.88	129.0	271.0	3.7	3.92	2.47	1.06	0.51	20.0	8.0	4.47	246.0	4.99
1260352	293	GC	male	70	9.9	3.07	400.0	1.09	6.01	3.45	79.7	2.01	88.0	377.0	3.35	3.34	1.97	0.88	1.08	20.0	17.0	4.08	361.0	4.73
1260563	294	GC	male	54	12.5	2.84	2130.0	1.08	4.54	4.2	98.8	1.68	138.0	164.0	2.5	3.74	1.58	1.15	0.84	15.0	11.0	3.98	266.0	5.61
1260666	295	GC	male	59	10.6	4.13	360.0	1.05	6.04	4.87	88.7	1.72	137.0	309.0	3.59	4.12	2.59	1.13	0.81	15.0	8.0	5.29	254.0	4.5
1260753	296	GC	male	40	9.5	3.13	240.0	0.99	4.27	4.32	93.3	1.11	135.0	187.0	2.82	6.38	3.9	1.33	1.1	18.0	16.0	4.51	350.0	4.8
1260883	297	GC	male	70	10.3	3.59	220.0	1.06	7.49	4.3	91.2	2.32	129.0	320.0	4.41	4.5	2.5	1.63	0.63	14.0	8.0	4.87	254.0	4.27
1261080	298	GC	male	83	11.0	3.25	720.0	1.11	6.61	4.25	94.8	1.68	134.0	372.0	4.05	4.51	2.14	1.69	0.56	18.0	16.0	4.89	283.0	4.23
1261094	299	GC	female	66	10.9	4.36	220.0	0.98	7.71	4.57	92.9	2.58	143.0	270.0	4.47	4.35	2.23	1.04	1.54	16.0	14.0	4.49	330.0	5.57
1261196	300	GC	male	71	8.8	2.3	920.0	1.2	3.23	3.32	75.6	0.71	72.0	191.0	2.21	3.06	1.6	0.91	0.9	11.6	6.2	3.6	212.5	3.52
1261205	301	GC	male	66	9.9	3.59	1580.0	1.07	5.47	4.65	85.0	2.44	126.0	291.0	2.57	6.15	3.13	1.92	1.27	23.0	15.0	4.48	174.0	4.56
1261223	302	GC	female	44	11.1	4.75	620.0	1.05	12.59	3.24	88.6	0.95	93.0	253.0	10.74	3.46	1.97	1.06	0.47	72.0	77.0	4.58	223.0	5.5
1261286	303	GC	male	52	9.4	2.3	220.0	1.09	4.78	4.89	88.6	1.55	146.0	281.0	2.92	5.96	3.69	1.32	1.49	18.0	11.0	4.4	245.0	5.3
1261432	304	GC	female	76	12.2	3.15	280.0	1.22	4.57	4.21	89.3	1.17	125.0	185.0	2.87	3.82	2.4	1.12	0.63	13.9	9.9	4.67	262.0	3.82
1261555	305	GC	male	67	10.8	5.54	1650.0	0.95	13.97	4.28	90.2	1.08	123.0	221.0	11.74	3.73	1.97	1.22	0.53	14.7	54.7	4.48	174.0	7.79
1261681	306	GC	female	71	11.0	3.97	260.0	0.96	5.05	4.12	101.7	1.59	139.0	250.0	3.1	3.85	1.76	1.7	0.71	16.0	10.0	4.64	274.0	4.18
1261799	307	GC	female	59	11.8	4.92	970.0	0.99	10.04	4.52	87.2	1.44	131.0	368.0	8.09	4.92	3.32	0.91	1.19	24.86	77.65	4.56	403.51	4.63
1261827	308	GC	male	83	11.7	2.64	150.0	1.21	4.73	4.76	86.8	1.3	135.0	154.0	2.78	5.26	2.97	1.45	0.97	14.2	7.1	4.5	226.4	4.0
1262012	309	GC	male	67	10.6	3.05	360.0	1.07	6.21	4.64	88.5	1.84	140.0	225.0	3.86	4.05	2.6	1.03	1.62	23.0	14.0	4.54	350.0	4.78
1262304	310	GC	male	73	9.0	3.64	700.0	1.15	4.28	4.47	101.5	1.69	151.0	170.0	2.15	5.82	2.52	2.53	0.68	18.0	10.0	4.89	294.0	4.38
1262393	311	GC	male	44	9.3	3.64	280.0	1.09	8.5	4.84	92.1	2.97	152.0	187.0	4.96	5.57	3.14	1.18	1.82	21.0	19.0	3.82	210.0	7.92
1262693	312	GC	male	77	10.9	3.85	1680.0	1.01	3.84	3.06	85.9	0.47	90.0	182.0	2.94	8.82	7.41	0.21	1.17	116.1	102.8	4.52	147.7	3.87
1262711	313	GC	male	73	8.2	5.01	830.0	0.95	4.07	3.88	90.2	0.59	117.0	367.0	3.26	6.24	3.53	1.72	1.7	19.0	11.0	4.1	221.0	4.66
1262876	314	GC	male	48	9.7	3.47	480.0	1.2	7.26	3.55	77.7	2.65	83.0	497.0	3.76	5.33	2.86	1.36	0.94	16.0	13.0	4.71	241.0	3.99
1263037	315	GC	female	59	11.4	2.11	520.0	1.35	3.48	3.06	89.2	1.32	89.0	340.0	1.84	2.27	0.89	1.08	0.58	15.2	14.8	4.43	125.3	4.13
1263406	316	GC	female	69	9.1	3.66	420.0	0.97	10.12	5.0	90.2	4.03	153.0	195.0	5.22	5.92	3.87	1.32	1.56	15.0	11.0	4.54	260.0	3.99
1263481	317	GC	male	59	12.8	4.09	260.0	1.16	6.63	4.14	72.9	1.14	92.0	431.0	5.18	3.22	1.57	1.07	0.58	10.8	8.6	4.85	160.2	5.31
1263485	318	GC	male	72	9.8	2.18	1860.0	1.15	3.32	3.94	101.0	1.33	132.0	107.0	1.64	4.84	2.69	1.71	1.6	47.0	53.0	4.07	349.0	4.54
1263495	319	GC	female	87	9.2	3.81	260.0	0.95	4.73	4.86	84.0	1.04	135.0	228.0	3.3	5.63	3.48	1.02	1.53	18.1	12.3	4.28	182.5	4.42
1263735	320	GC	female	77	8.3	3.08	570.0	0.88	4.63	4.5	94.9	1.2	140.0	208.0	2.91	6.5	3.34	1.85	1.13	87.2	77.9	4.18	197.7	3.94
1263942	321	GC	female	79	11.0	3.51	260.0	1.04	5.55	4.67	95.2	1.97	144.0	281.0	3.1	7.25	3.86	2.03	0.67	19.0	15.0	4.98	269.0	4.93
1264417	322	GC	female	62	9.1	4.13	660.0	1.12	5.49	3.3	96.7	2.54	103.0	296.0	2.23	5.2	3.31	1.46	1.25	23.0	19.0	4.69	341.0	4.48
1264448	323	GC	male	79	11.7	3.85	630.0	1.11	4.14	2.89	85.0	1.75	74.0	359.0	1.96	3.33	1.75	0.75	1.27	19.0	9.0	4.05	175.0	4.79
1264717	324	GC	male	78	10.6	2.52	280.0	1.15	3.75	4.01	90.8	1.59	121.0	198.0	1.71	4.39	2.92	1.07	0.61	13.0	10.0	4.32	300.0	4.38
1264875	325	GC	male	61	10.2	2.5	3470.0	1.11	5.4	3.74	79.8	1.1	93.0	138.0	3.71	4.73	2.93	0.86	1.07	16.0	9.0	3.77	160.0	5.34
1265036	326	GC	female	80	9.4	3.2	260.0	1.16	4.49	4.68	85.0	1.52	133.0	163.0	2.75	5.13	3.15	1.31	1.55	23.0	29.0	4.02	218.0	9.91
1265129	327	GC	female	88	9.2	2.45	200.0	1.15	6.18	4.71	95.0	2.6	148.0	182.0	2.95	6.94	4.13	1.87	1.85	22.0	17.0	4.38	336.0	4.56
1265134	328	GC	male	72	9.9	3.27	110.0	1.32	6.03	3.16	80.7	1.03	89.0	245.0	4.27	3.36	1.92	1.01	0.9	16.7	11.1	4.41	162.8	2.47
1265187	329	GC	female	69	9.5	3.59	1600.0	0.98	7.98	4.88	94.3	1.41	161.0	254.0	6.0	6.06	3.53	1.41	1.08	17.0	15.0	4.48	384.0	5.13
1265302	330	GC	male	64	9.2	2.49	20.0	1.07	4.65	4.44	84.5	1.85	127.0	227.0	2.15	4.84	2.81	0.97	1.77	14.6	14.3	3.65	238.3	5.48
1265412	331	GC	male	69	9.2	3.01	380.0	0.95	6.29	4.92	91.5	1.89	155.0	216.0	3.89	4.8	2.64	1.14	0.76	14.3	10.7	4.64	264.2	4.98
1266256	332	GC	male	71	10.7	3.45	2910.0	1.12	3.86	3.42	74.6	1.12	78.0	167.0	2.34	3.8	1.68	1.25	0.58	12.0	7.0	3.86	198.0	4.85
1266544	333	GC	male	82	10.6	4.96	590.0	1.09	4.5	3.08	105.2	1.89	108.0	154.0	1.85	4.32	2.49	1.29	1.7	26.0	17.0	4.59	180.0	4.32
1267105	334	GC	male	72	12.4	2.36	590.0	1.29	6.11	4.19	81.1	0.77	113.0	248.0	4.32	3.96	2.61	0.92	0.73	17.0	14.5	4.64	285.9	4.08
1267119	335	GC	male	75	10.4	3.63	220.0	0.97	6.64	3.08	61.0	1.28	48.0	330.0	4.97	2.79	1.51	1.06	0.69	9.4	7.5	3.92	162.0	6.34
1267157	336	GC	male	71	9.5	2.72	210.0	1.18	5.05	4.05	92.6	1.57	121.0	306.0	3.14	5.19	2.96	1.88	0.63	31.0	51.0	4.16	166.0	6.09
1267230	337	GC	male	67	9.4	3.53	950.0	1.21	4.62	3.53	95.5	1.58	105.0	297.0	2.41	4.18	2.31	1.45	0.58	19.0	9.0	4.81	202.0	3.96
1267720	338	GC	male	56	10.6	3.47	40.0	0.92	4.73	5.0	85.2	1.15	135.0	178.0	3.01	5.55	3.52	1.45	0.51	14.0	5.6	4.3	227.1	4.87
1268056	339	GC	female	49	10.7	3.55	510.0	1.22	7.49	4.69	91.3	0.98	145.0	170.0	5.99	4.9	2.74	1.44	0.64	26.0	21.0	4.4	312.0	4.61
1268284	340	GC	male	85	10.6	3.27	400.0	1.11	5.96	4.53	89.2	2.46	137.0	226.0	2.85	4.14	2.64	0.92	1.38	19.0	13.0	4.45	268.0	5.0
1268458	341	GC	female	66	10.7	4.42	350.0	1.02	7.16	4.74	90.3	2.39	141.0	408.0	4.12	6.06	3.19	1.53	1.34	17.0	22.0	4.55	307.0	4.7
1268620	342	GC	male	70	12.0	2.0	11830.0	1.2	9.18	4.27	87.8	0.91	118.0	152.0	7.35	5.26	3.3	0.98	2.51	54.0	37.0	4.66	353.0	4.61
1268648	343	GC	male	70	13.1	3.28	390.0	1.28	4.69	3.58	86.6	1.61	105.0	231.0	2.5	2.97	1.71	0.99	0.84	10.7	3.8	3.93	299.1	4.22
1268880	344	GC	male	71	9.9	3.34	750.0	1.09	3.22	4.23	83.6	1.25	112.0	275.0	1.55	4.64	3.22	0.99	1.07	16.0	15.0	3.83	235.0	4.88
1268992	345	GC	female	44	10.0	3.33	160.0	1.09	5.38	4.51	97.6	2.06	149.0	239.0	2.75	5.16	3.09	1.5	1.09	22.0	13.0	4.74	213.0	4.96
1269016	346	GC	male	67	12.5	1.82	2710.0	1.2	3.78	3.38	87.6	1.08	97.0	158.0	2.37	3.38	1.76	1.28	0.41	12.6	8.5	4.04	358.9	3.36
1269089	347	GC	male	40	9.6	3.41	270.0	1.05	8.89	4.55	93.2	1.37	145.0	313.0	7.14	5.66	3.17	1.71	1.21	17.0	11.0	4.21	191.0	7.78
1269197	348	GC	male	64	9.2	3.55	240.0	1.15	4.96	4.67	91.4	2.59	142.0	363.0	1.99	7.86	5.54	1.73	1.34	18.0	11.0	3.97	368.0	4.9
1269220	349	GC	male	85	9.7	3.21	260.0	0.99	6.69	3.91	77.2	2.2	88.0	401.0	3.92	4.15	2.36	1.2	0.79	16.0	22.1	3.93	206.6	4.19
1269658	350	GC	male	71	10.6	2.38	250.0	1.16	6.06	4.46	80.5	1.95	110.0	218.0	3.42	4.51	2.58	1.36	1.49	16.0	11.0	4.51	176.0	5.3
